# Supplementary material
Source: PubMed Central journal article supplement (PMC4201358)
Supplement: jo5016135_si_001.pdf [file jo5016135_si_001.pdf]

## Supporting Information

### Synthesis of A Library of Propargylated and PEGylated $\alpha$ -Hydroxy Acids Towards 'Clickable' Polylactides via Hydrolysis of Cyanohydrin Derivatives

Quanxuan Zhang,<sup>\*,†</sup> Hong Ren,<sup>‡,§</sup> and Gregory L. Baker<sup>†,††</sup>

<sup>†</sup>Department of Chemistry, Michigan State University, East Lansing, Michigan 48824, USA.

<sup>‡</sup>Department of Chemistry and Chemical Biology, Harvard University, Cambridge, Massachusetts 02138, USA.

<sup>§</sup>Athinoula A. Martinos Center for Biomedical Imaging, Department of Radiology, Massachusetts General Hospital, Harvard Medical School, Charlestown, Massachusetts 02129, USA.

E-mail: zhangqua@msu.edu

|                                                                  |               |
|------------------------------------------------------------------|---------------|
| <b>Table of contents</b> -----                                   | <b>S1</b>     |
| <b>1. General information for NMR and HRMS measurement</b> ----- | <b>S2</b>     |
| <b>2. NMR and HRMS Spectra of Compounds</b> -----                | <b>S3-S34</b> |

---

<sup>††</sup> Prof. Gregory L. Baker passed away on October 18, 2012 unexpectedly.

## 1. General information for NMR measurement

$^1\text{H}$  NMR and  $^{13}\text{C}$  NMR were recorded on a 300 MHz, 500 MHz or 600 MHz instrument in  $\text{CDCl}_3$  unless otherwise noted.  $\text{CDCl}_3$  was used as the internal standard for both  $^1\text{H}$  NMR ( $\delta = 7.24$ ) and  $^{13}\text{C}$  NMR ( $\delta = 77.0$ ). Data for  $^1\text{H}$  NMR and  $^{13}\text{C}$  NMR are reported in terms of chemical shift ( $\delta$  ppm). High-resolution mass spectra (HRMS) were taken on an ESI-TOF mass spectrometer.

## 2. NMR Spectra of Compounds

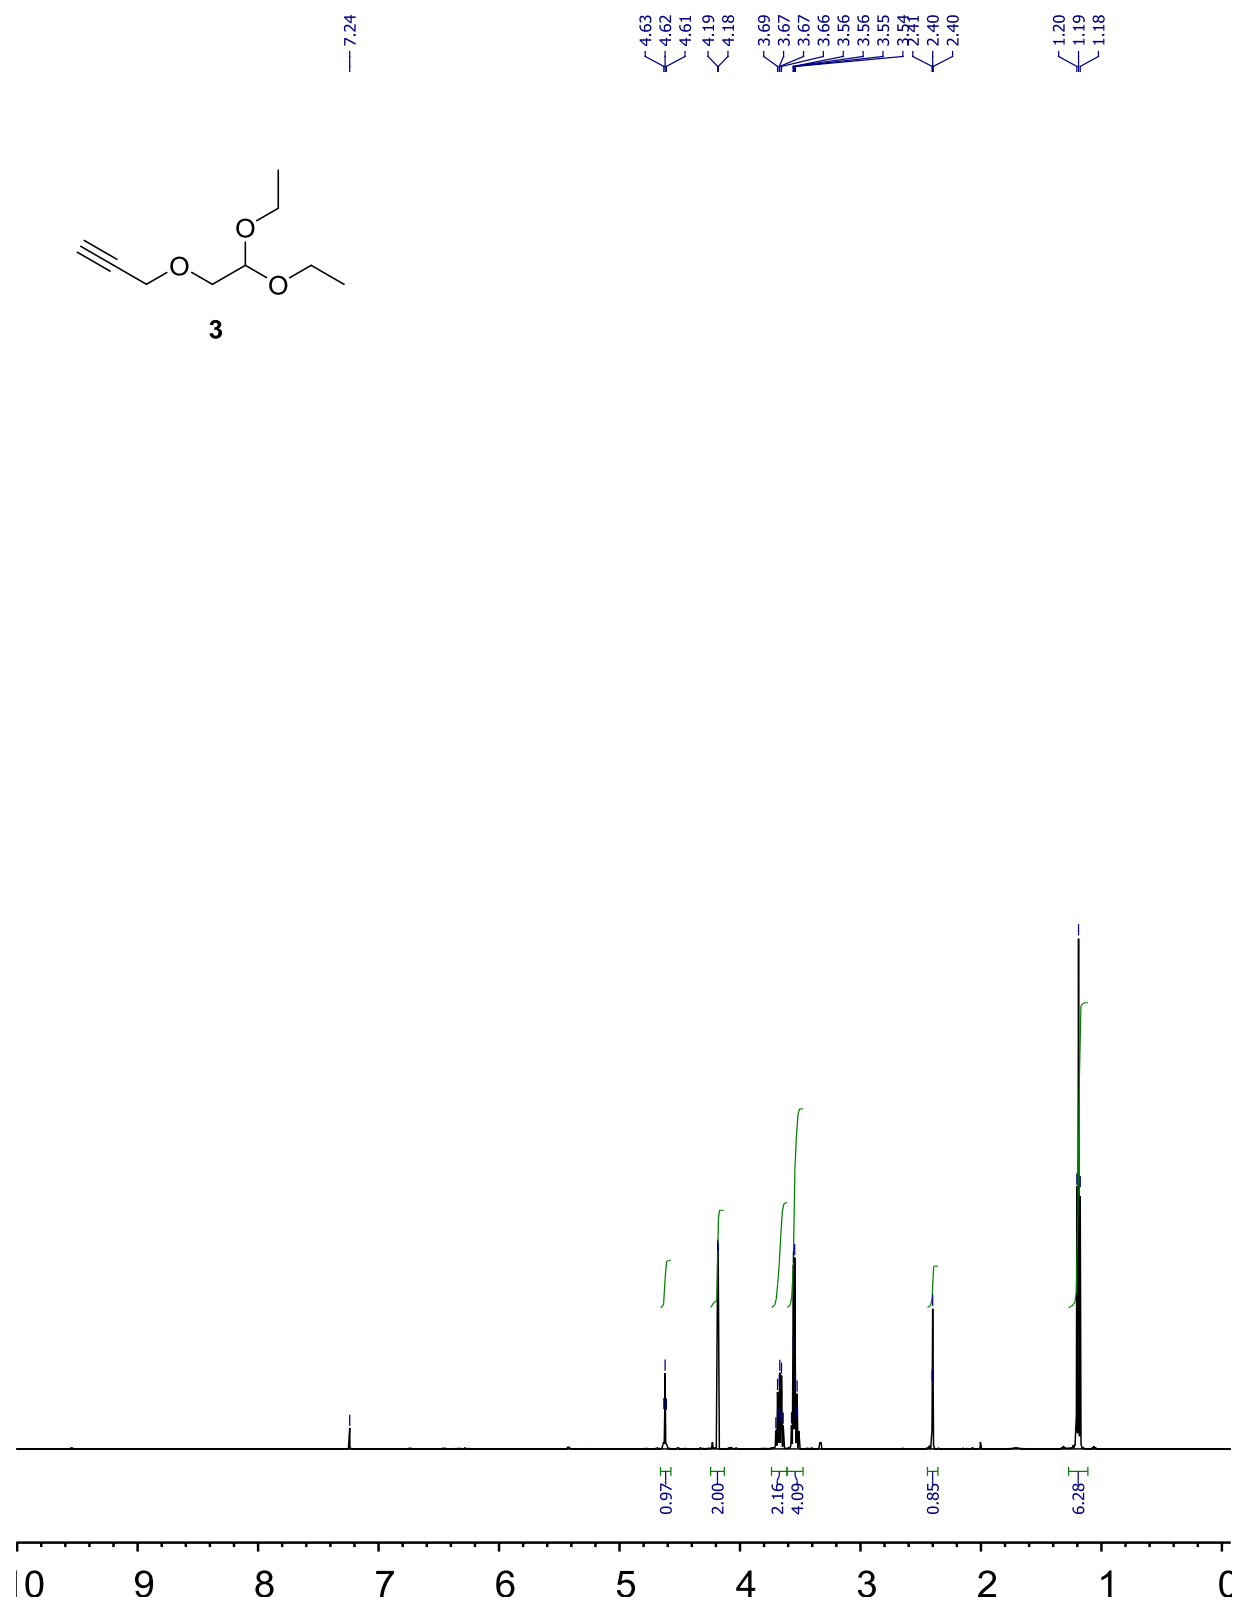

Figure S1.  $^1\text{H}$  NMR spectrum of **3** ( $\text{CDCl}_3$ , 500 MHz).

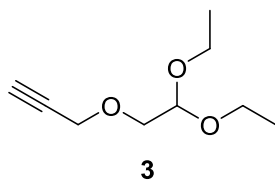

— 100.84  
— 79.48  
— 77.25  
— 77.00  
— 76.75  
— 74.56  
— 70.09  
— 62.18  
— 58.55  
— 15.29

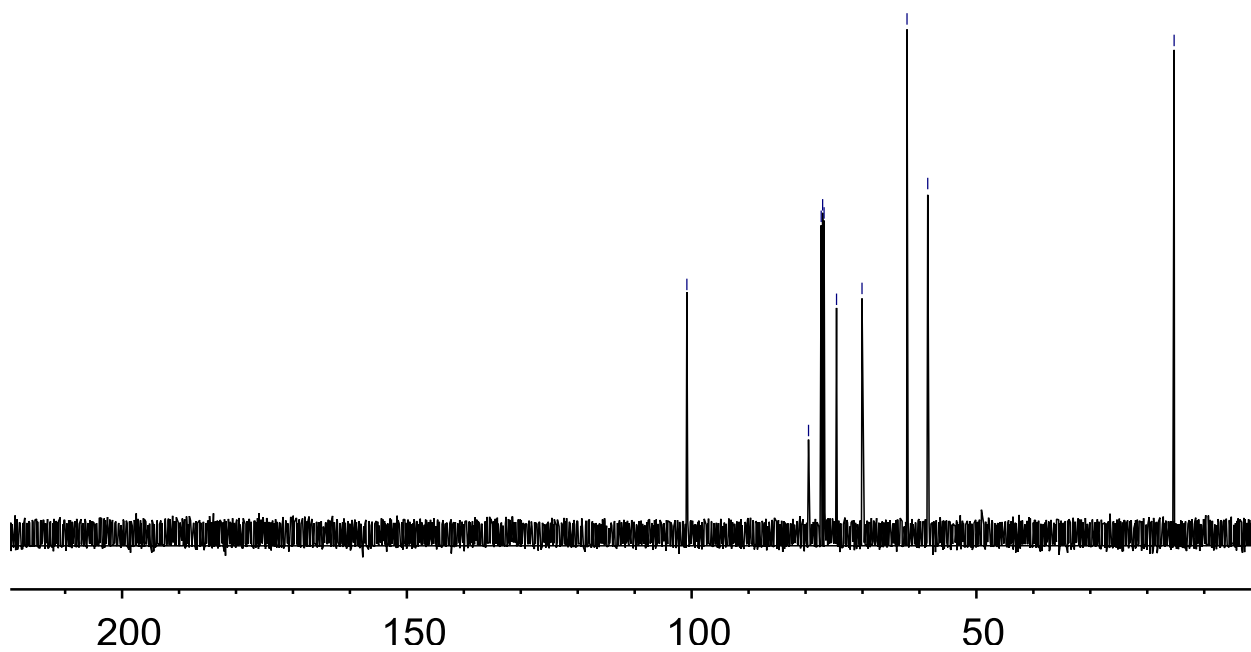

**Figure S2.**  $^{13}\text{C}$  NMR spectrum of **3** ( $\text{CDCl}_3$ , 125 MHz).

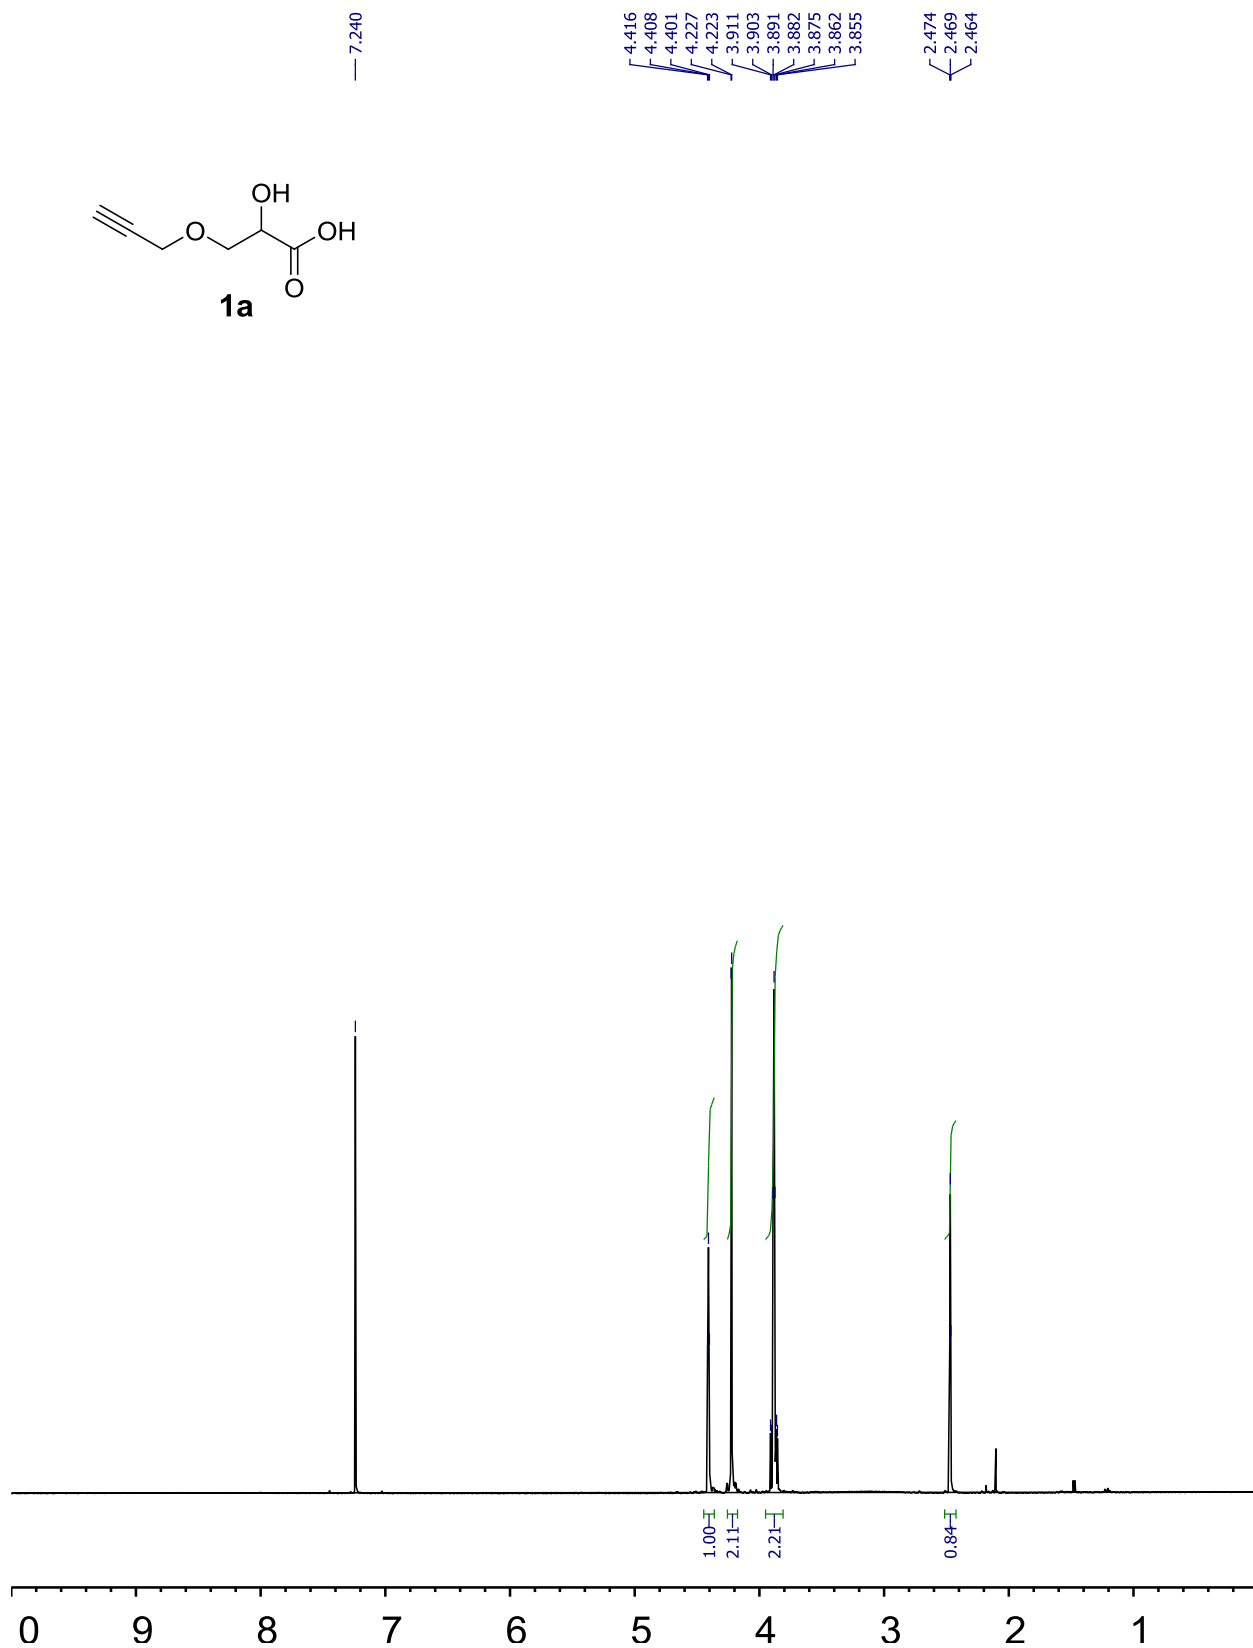

Figure S3. <sup>1</sup>H NMR spectrum of **1a** (CDCl<sub>3</sub>, 500 MHz).

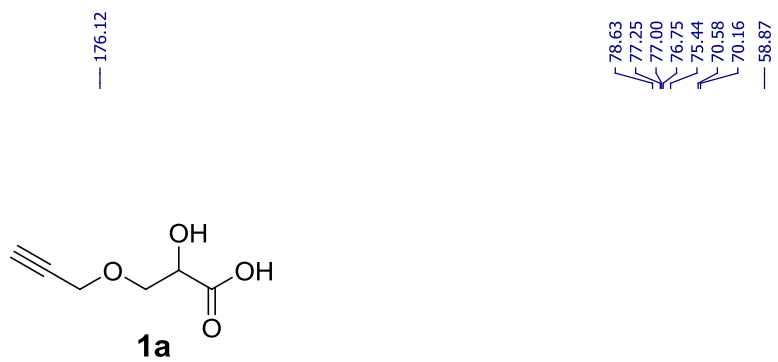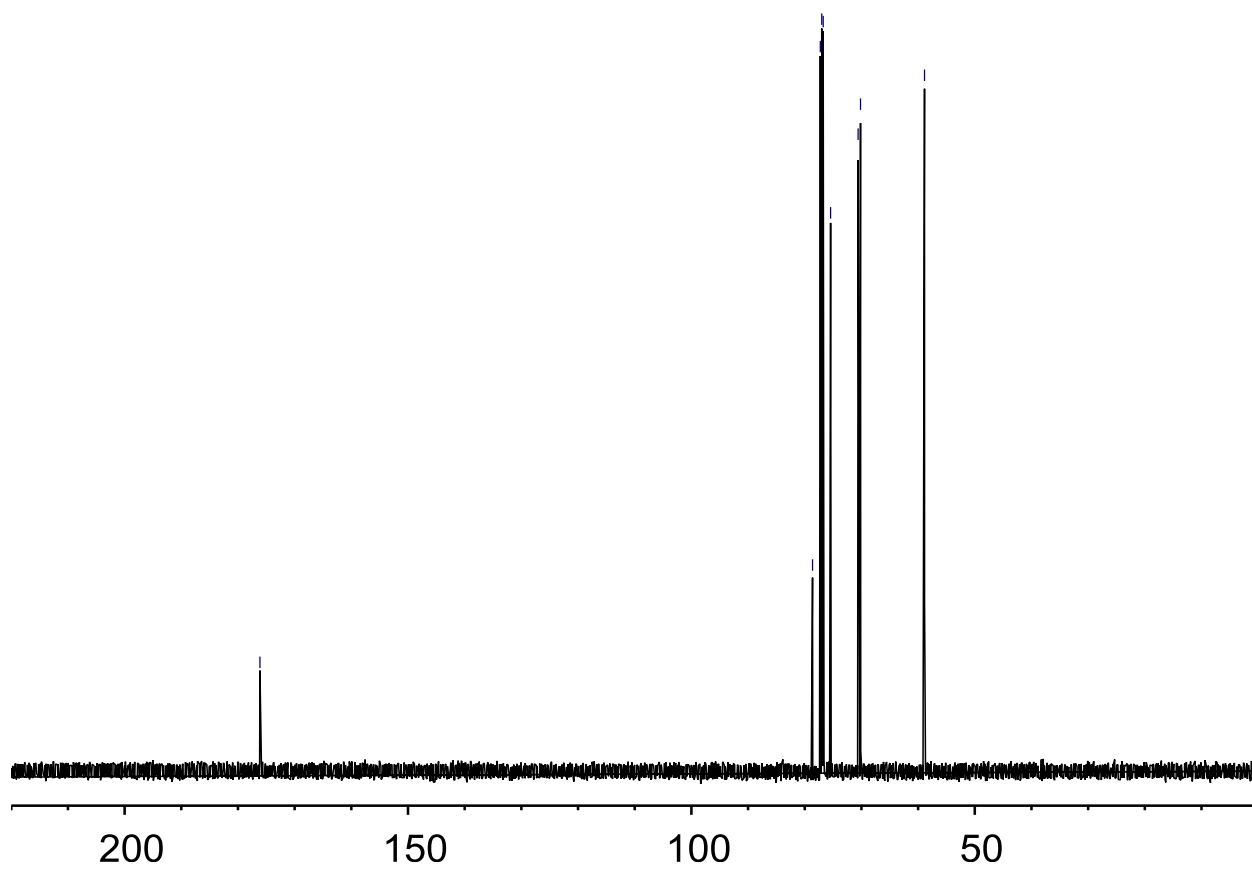

Figure S4.  $^{13}\text{C}$  NMR spectrum of **1a** ( $\text{CDCl}_3$ , 125 MHz).

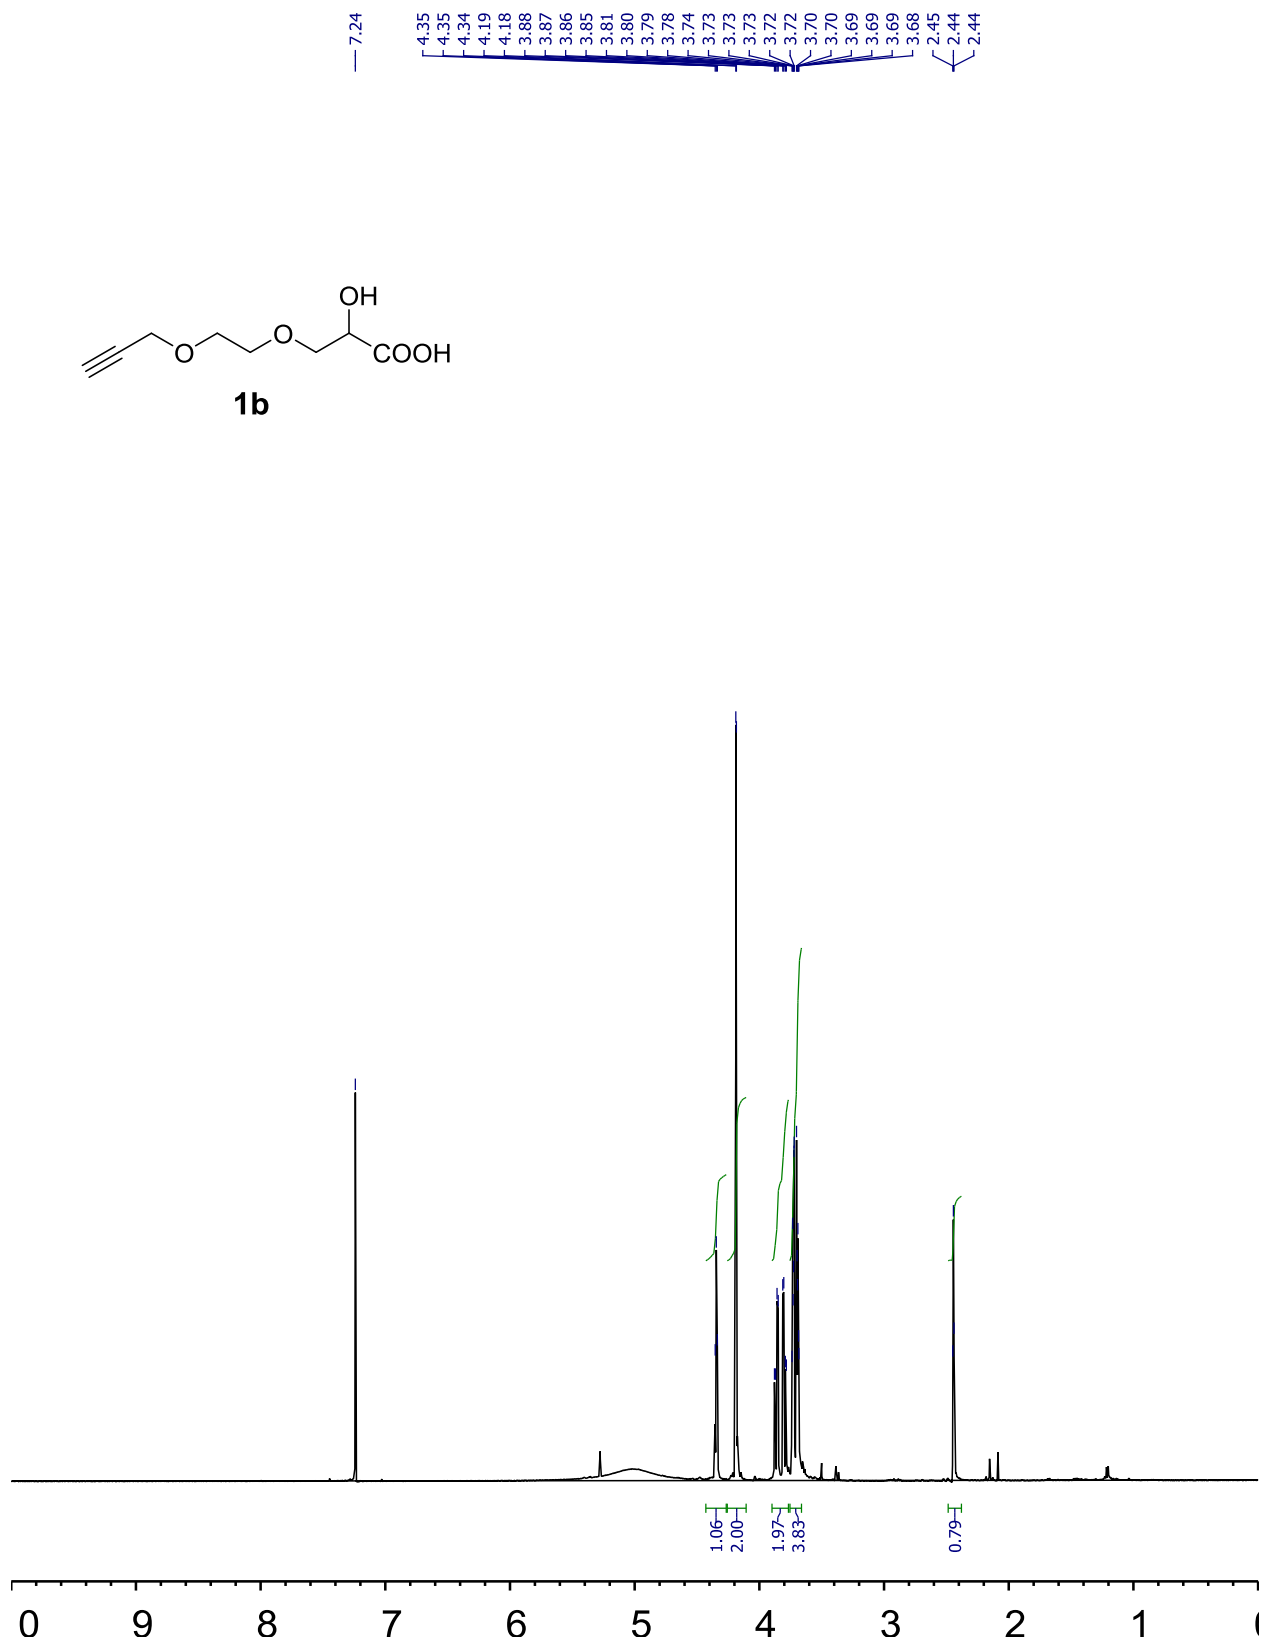

**Figure S5.**  $^1\text{H}$  NMR spectrum of **1b** ( $\text{CDCl}_3$ , 500 MHz).

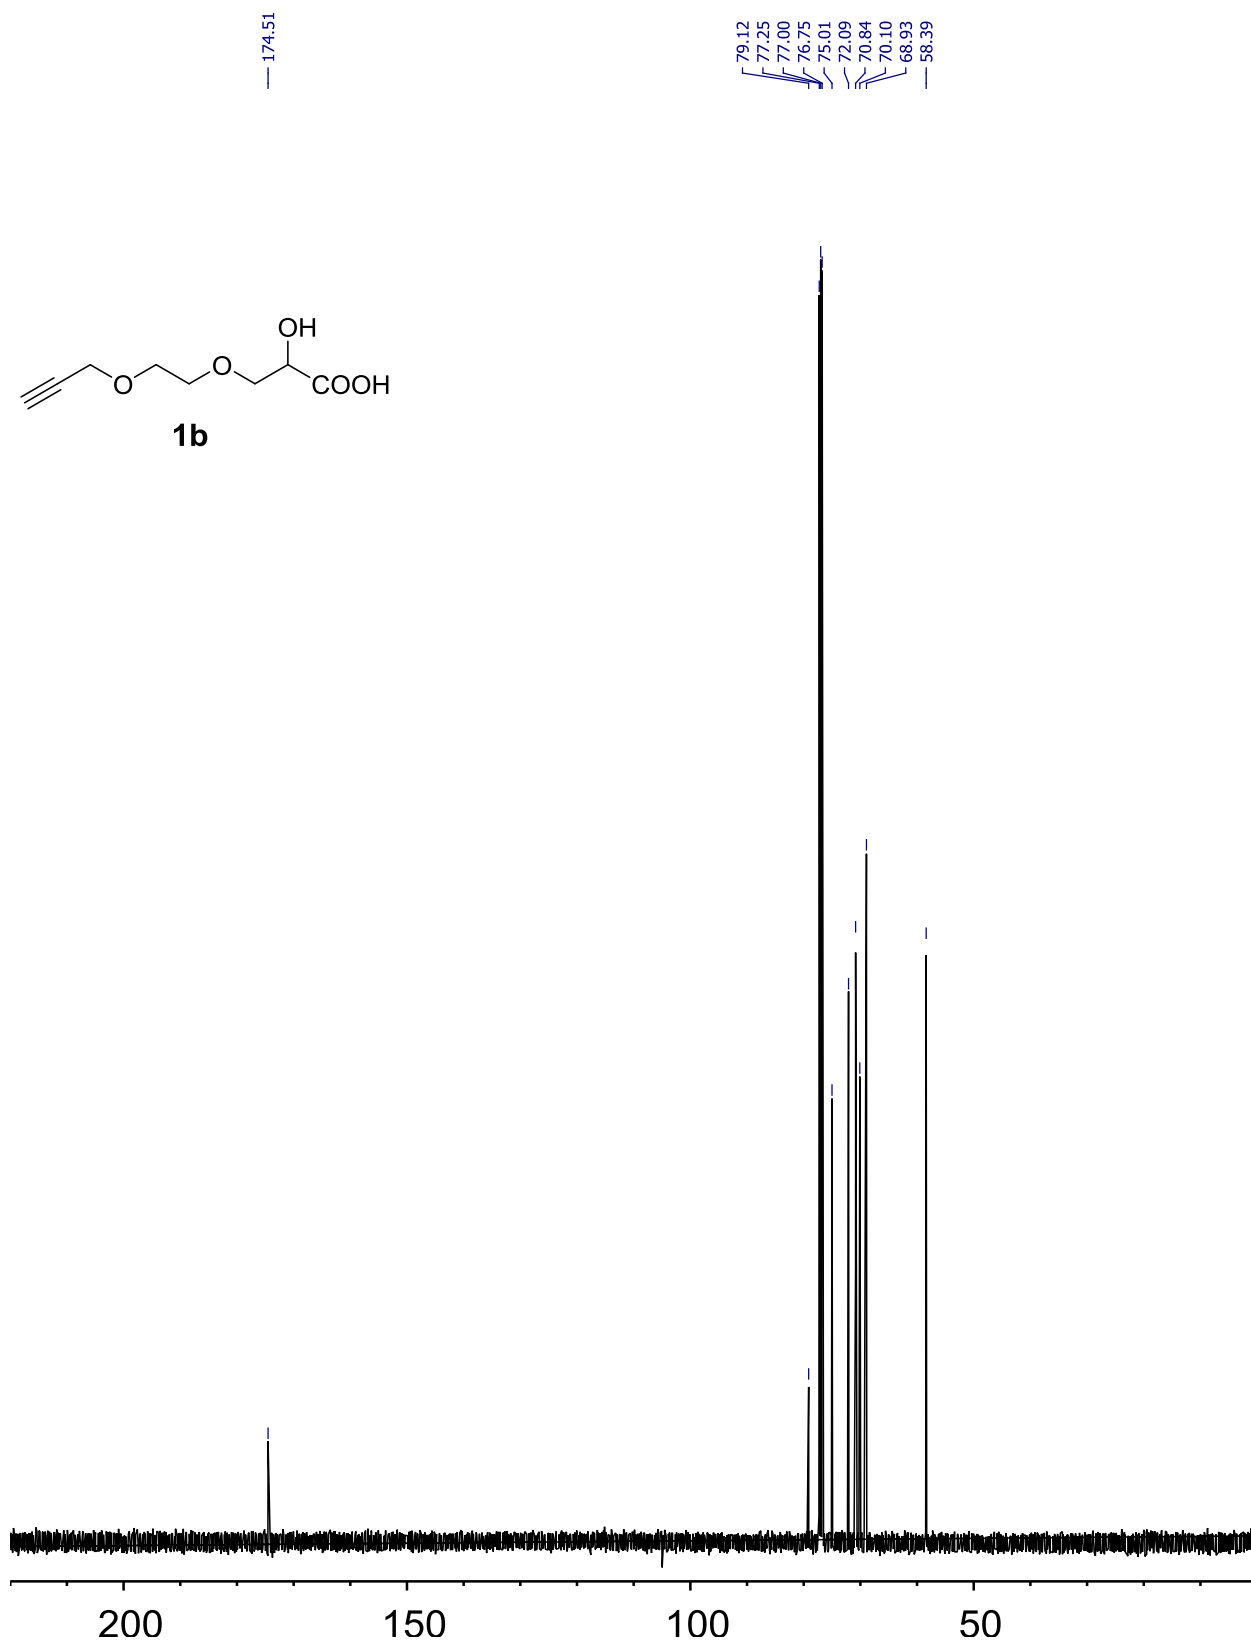

Figure S6.  $^{13}\text{C}$  NMR spectrum of **1b** (CDCl<sub>3</sub>, 125 MHz).



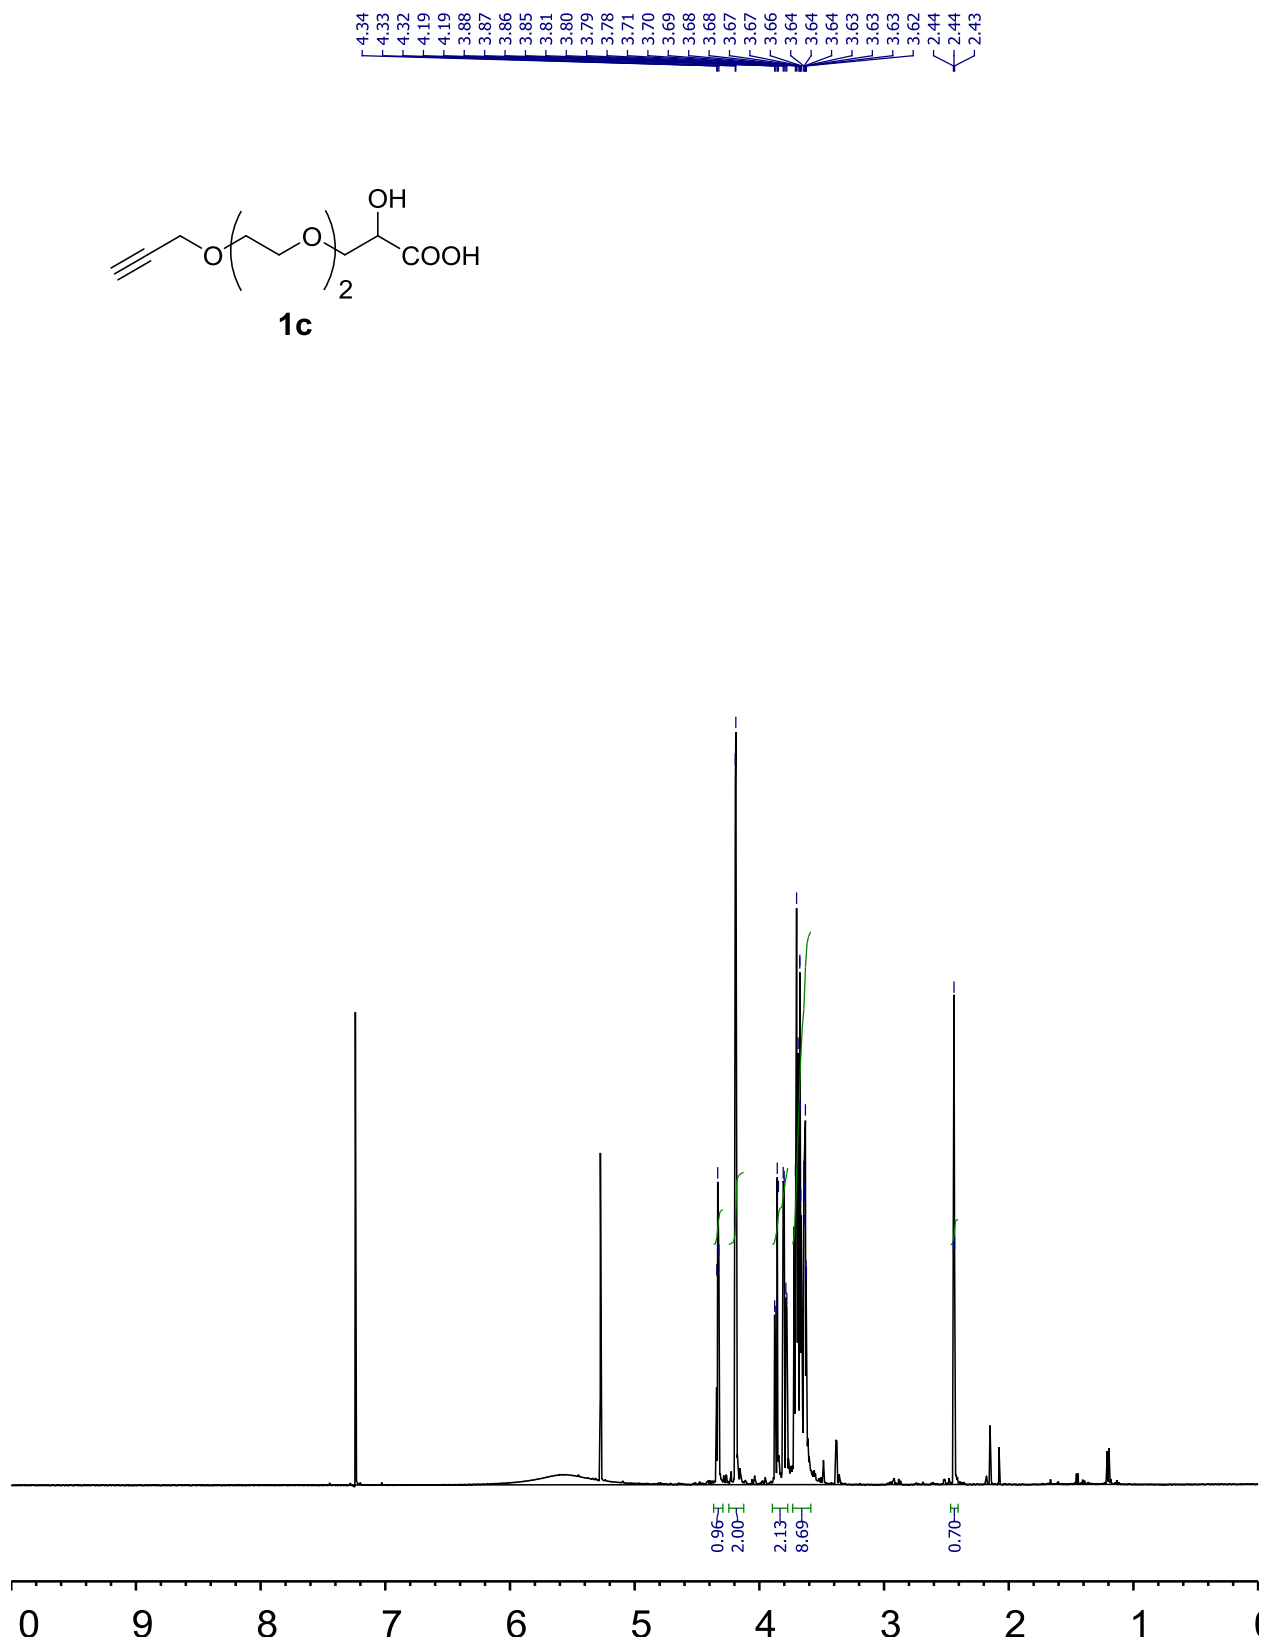

**Figure S7.**  $^1\text{H}$  NMR spectrum of **1c** ( $\text{CDCl}_3$ , 500 MHz).

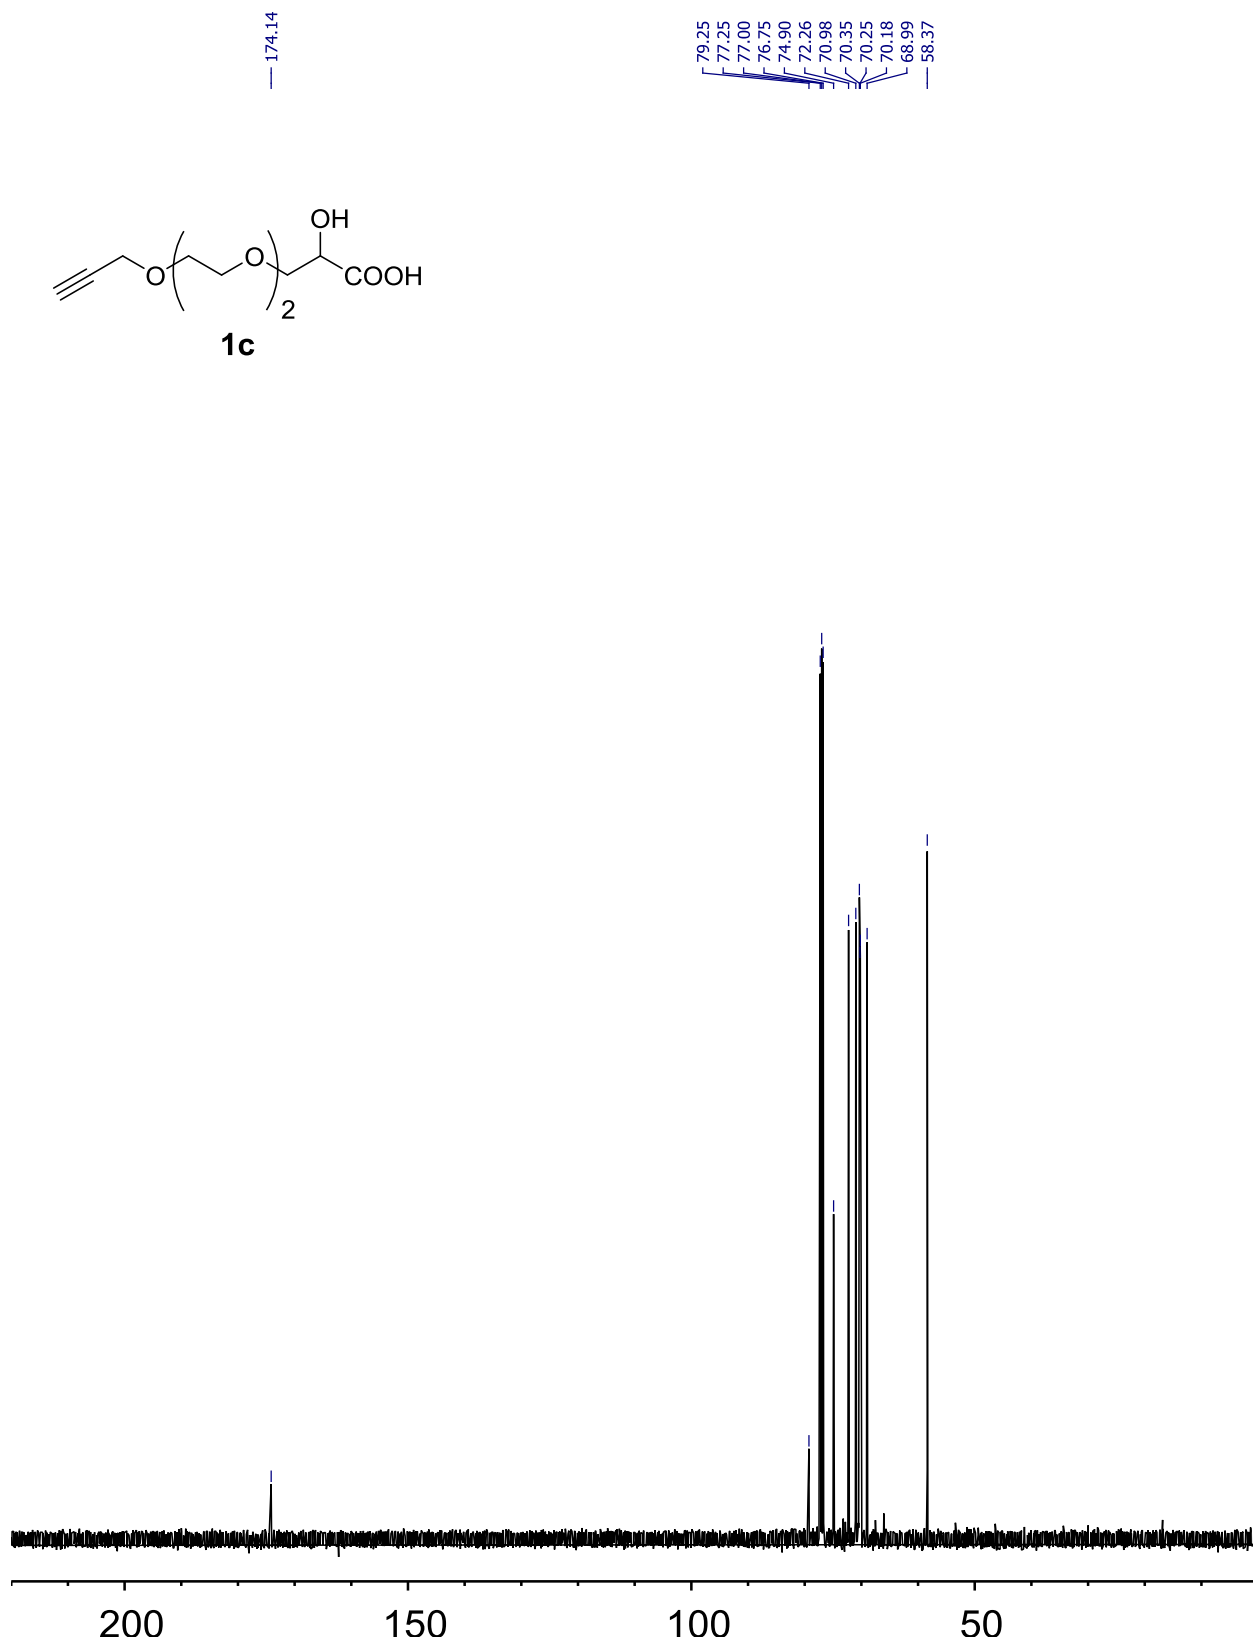

Figure S8.  $^{13}\text{C}$  NMR spectrum of **1c** (CDCl<sub>3</sub>, 125 MHz).

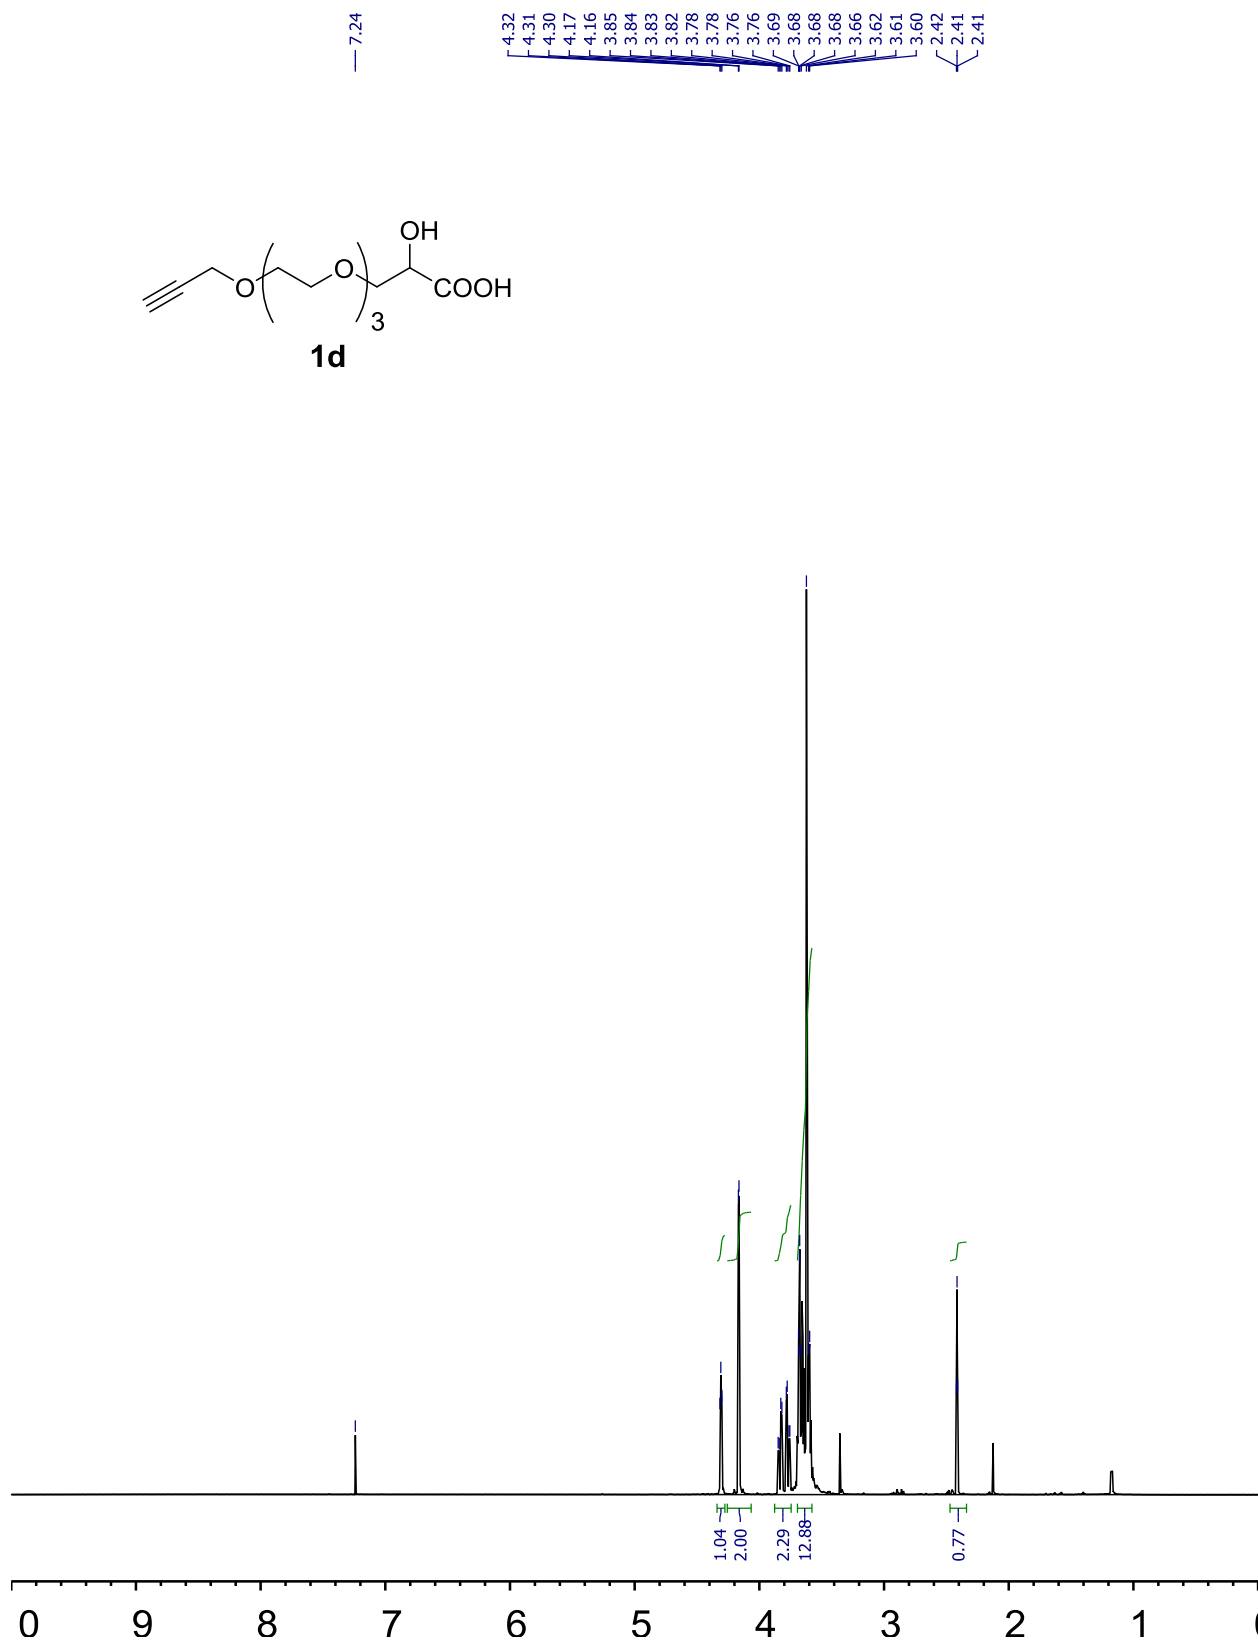

**Figure S9.**  $^1\text{H}$  NMR spectrum of **1d** ( $\text{CDCl}_3$ , 500 MHz).

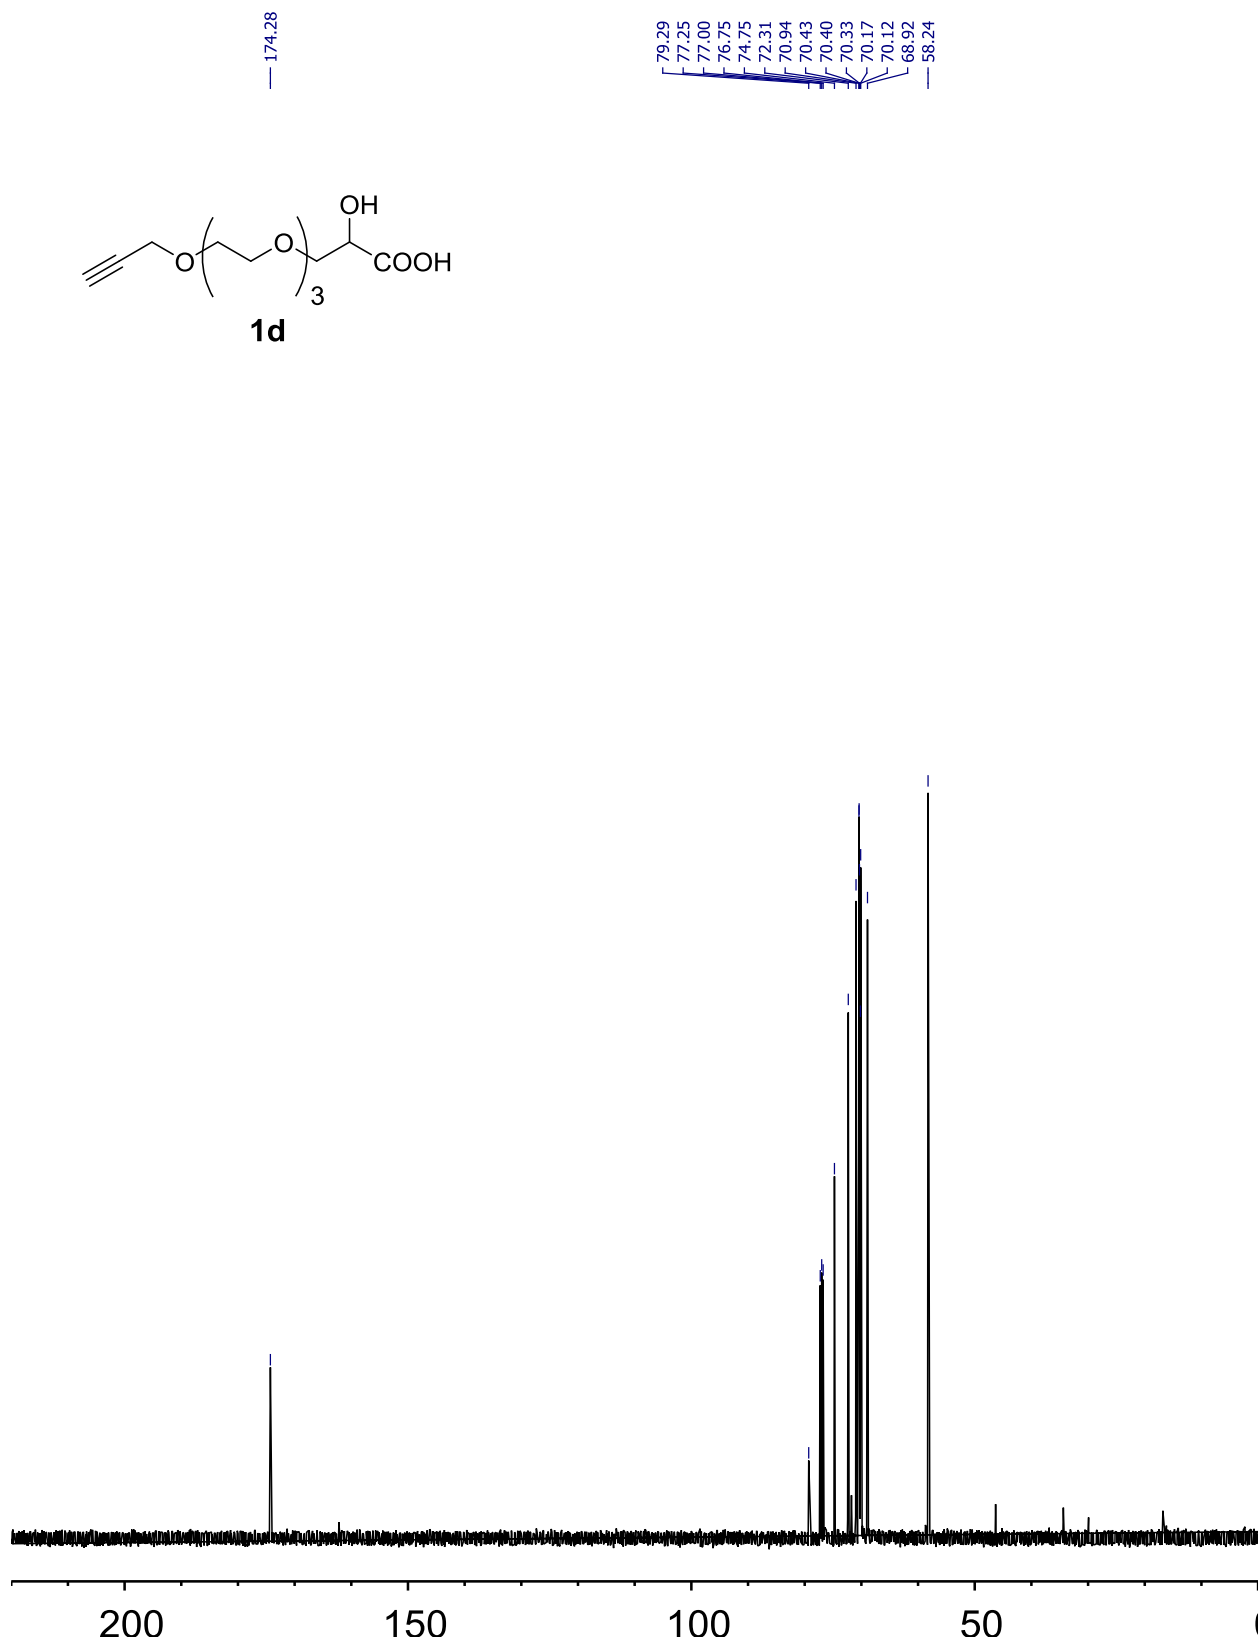

**Figure S10.**  $^{13}\text{C}$  NMR spectrum of **1d** (CDCl<sub>3</sub>, 125 MHz).

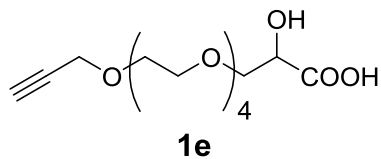

4.35  
 4.34  
 4.34  
 4.33  
 4.20  
 4.20  
 3.89  
 3.89  
 3.87  
 3.87  
 3.82  
 3.81  
 3.80  
 3.79  
 3.71  
 3.70  
 3.69  
 3.66  
 3.66  
 2.45  
 2.44  
 2.44

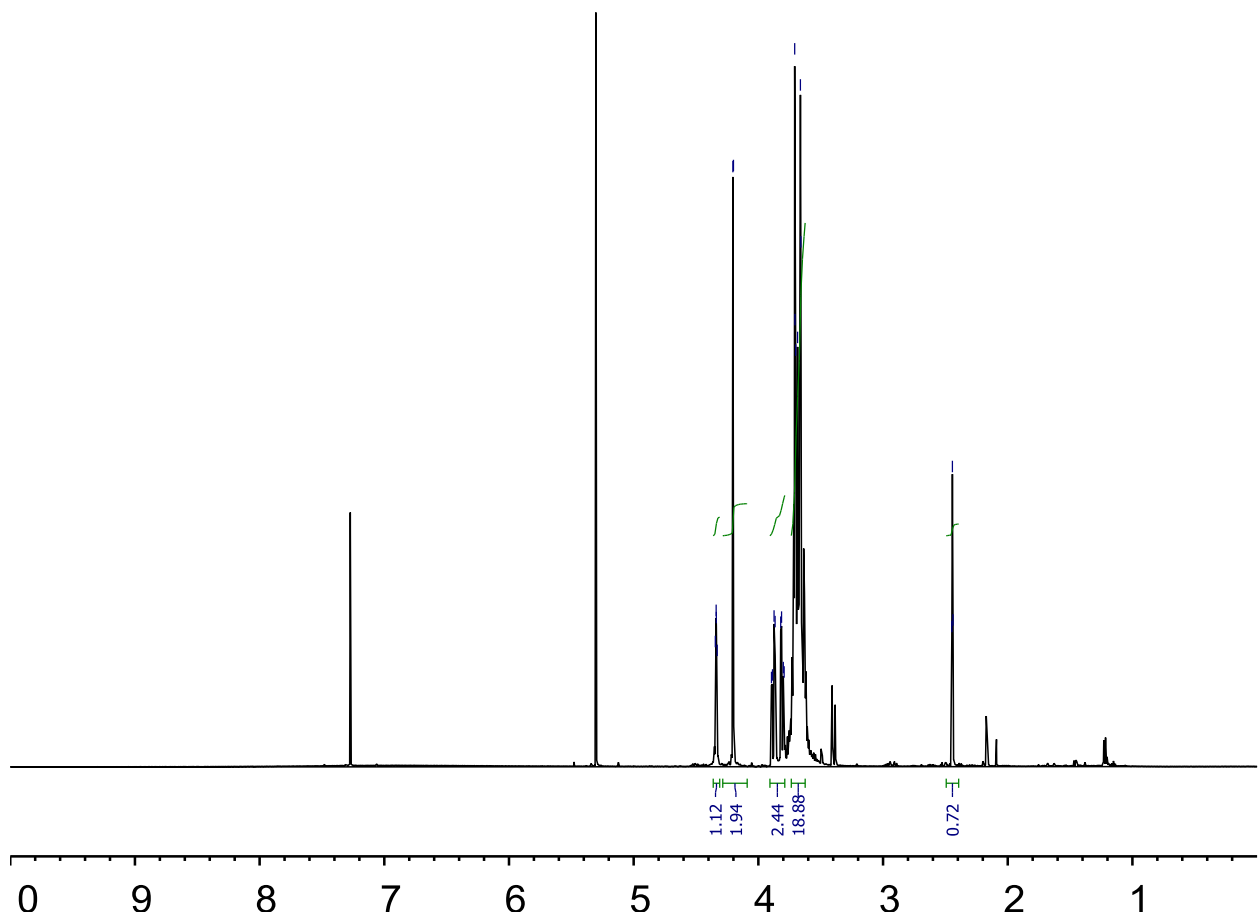

Figure S11. <sup>1</sup>H NMR spectrum of **1e** (CDCl<sub>3</sub>, 500 MHz).

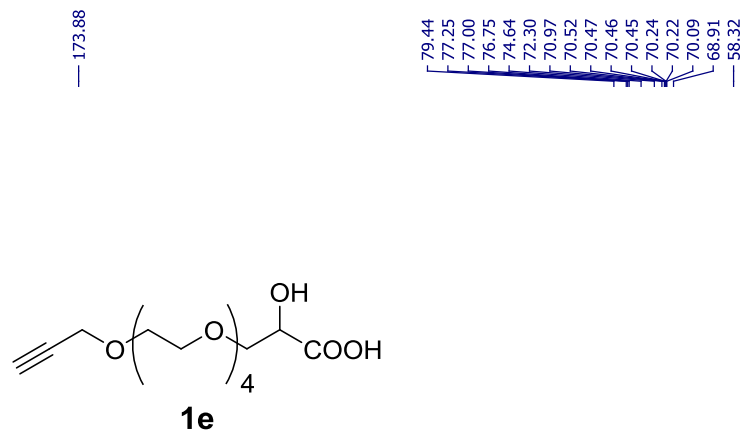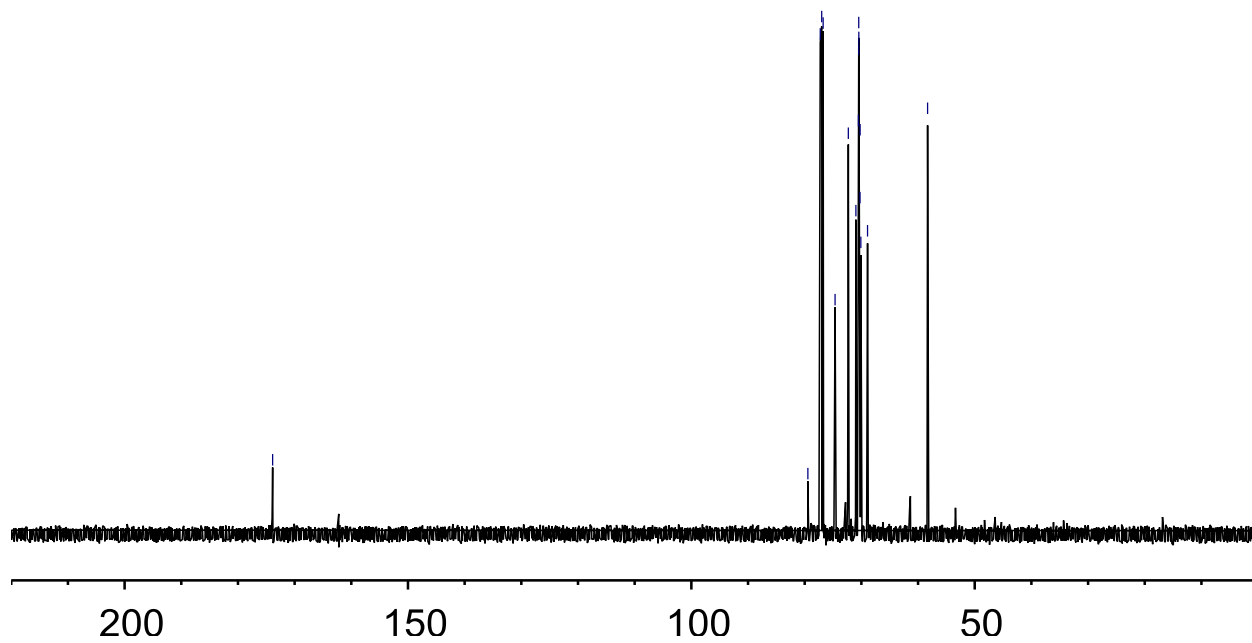

**Figure S12.**  $^{13}\text{C}$  NMR spectrum of **1e** ( $\text{CDCl}_3$ , 125 MHz).

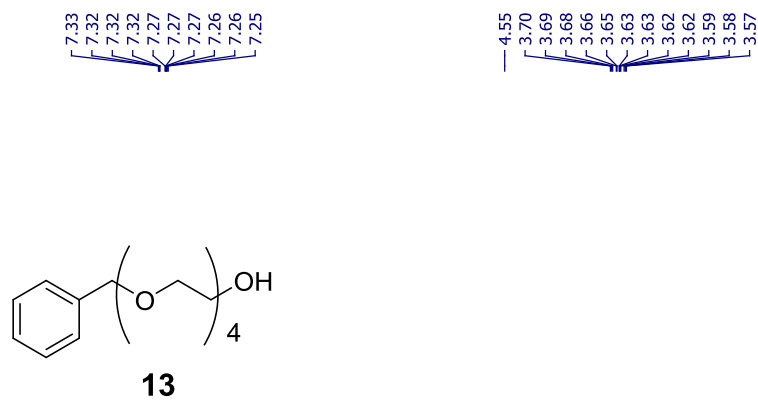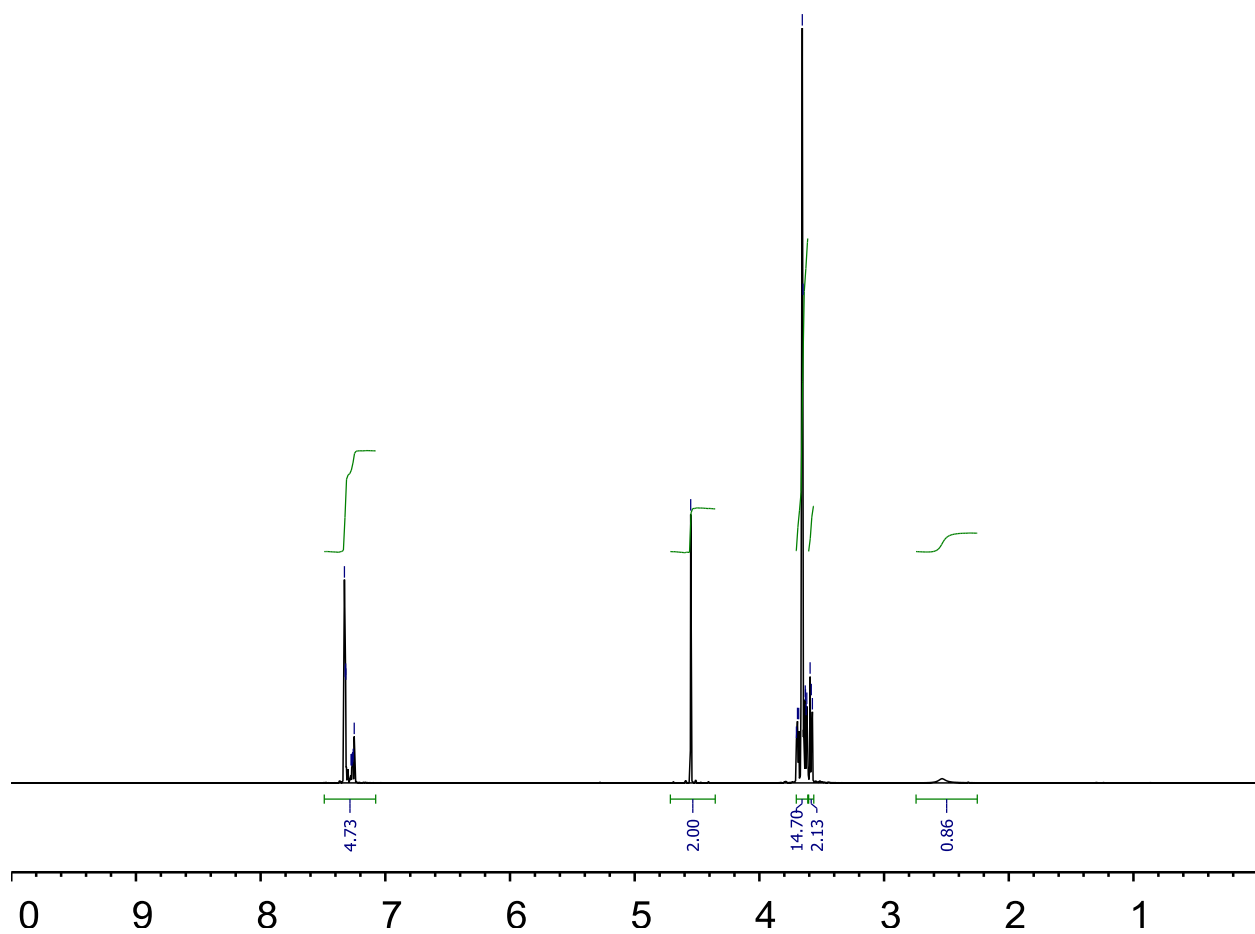

**Figure S13.**  $^1\text{H}$  NMR spectrum of **13** ( $\text{CDCl}_3$ , 500 MHz).

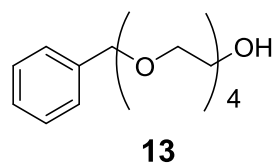

138.24  
128.30  
127.70  
127.54  
77.25  
77.00  
76.75  
73.21  
72.46  
70.63  
70.60  
70.58  
70.35  
69.43  
61.73

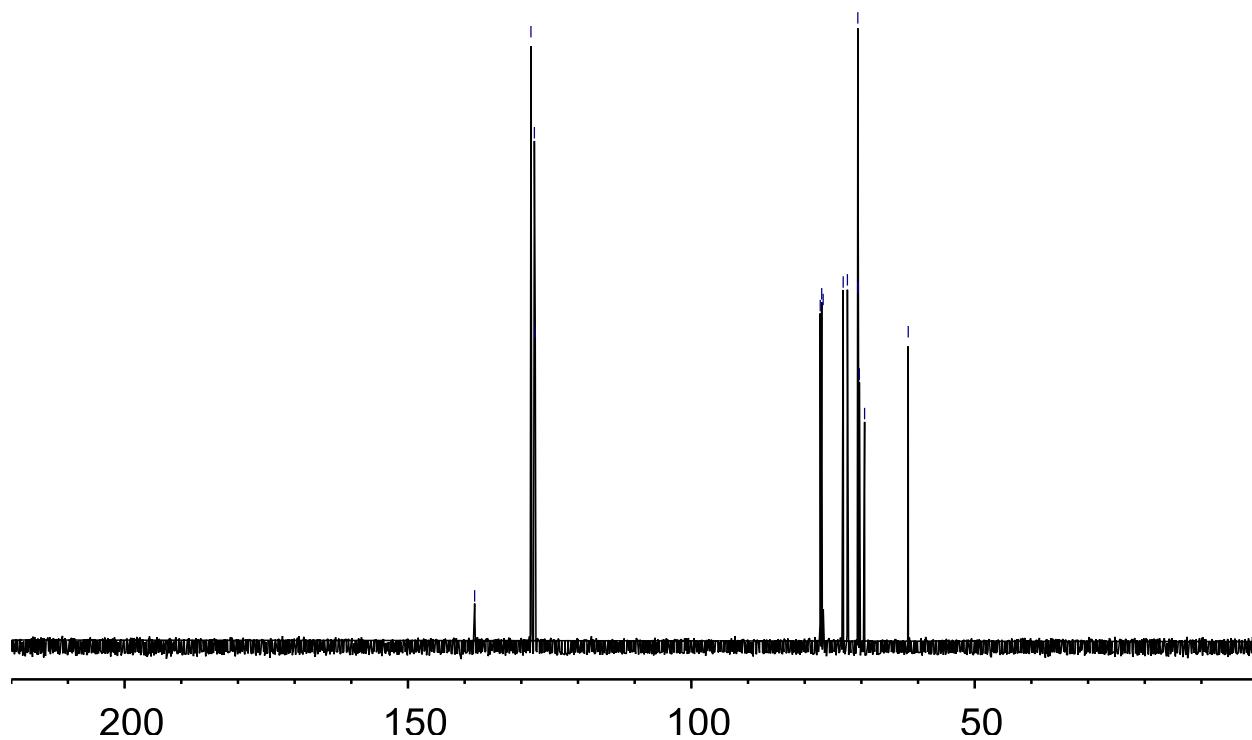

**Figure S14.**  $^{13}\text{C}$  NMR spectrum of **13** ( $\text{CDCl}_3$ , 125 MHz).



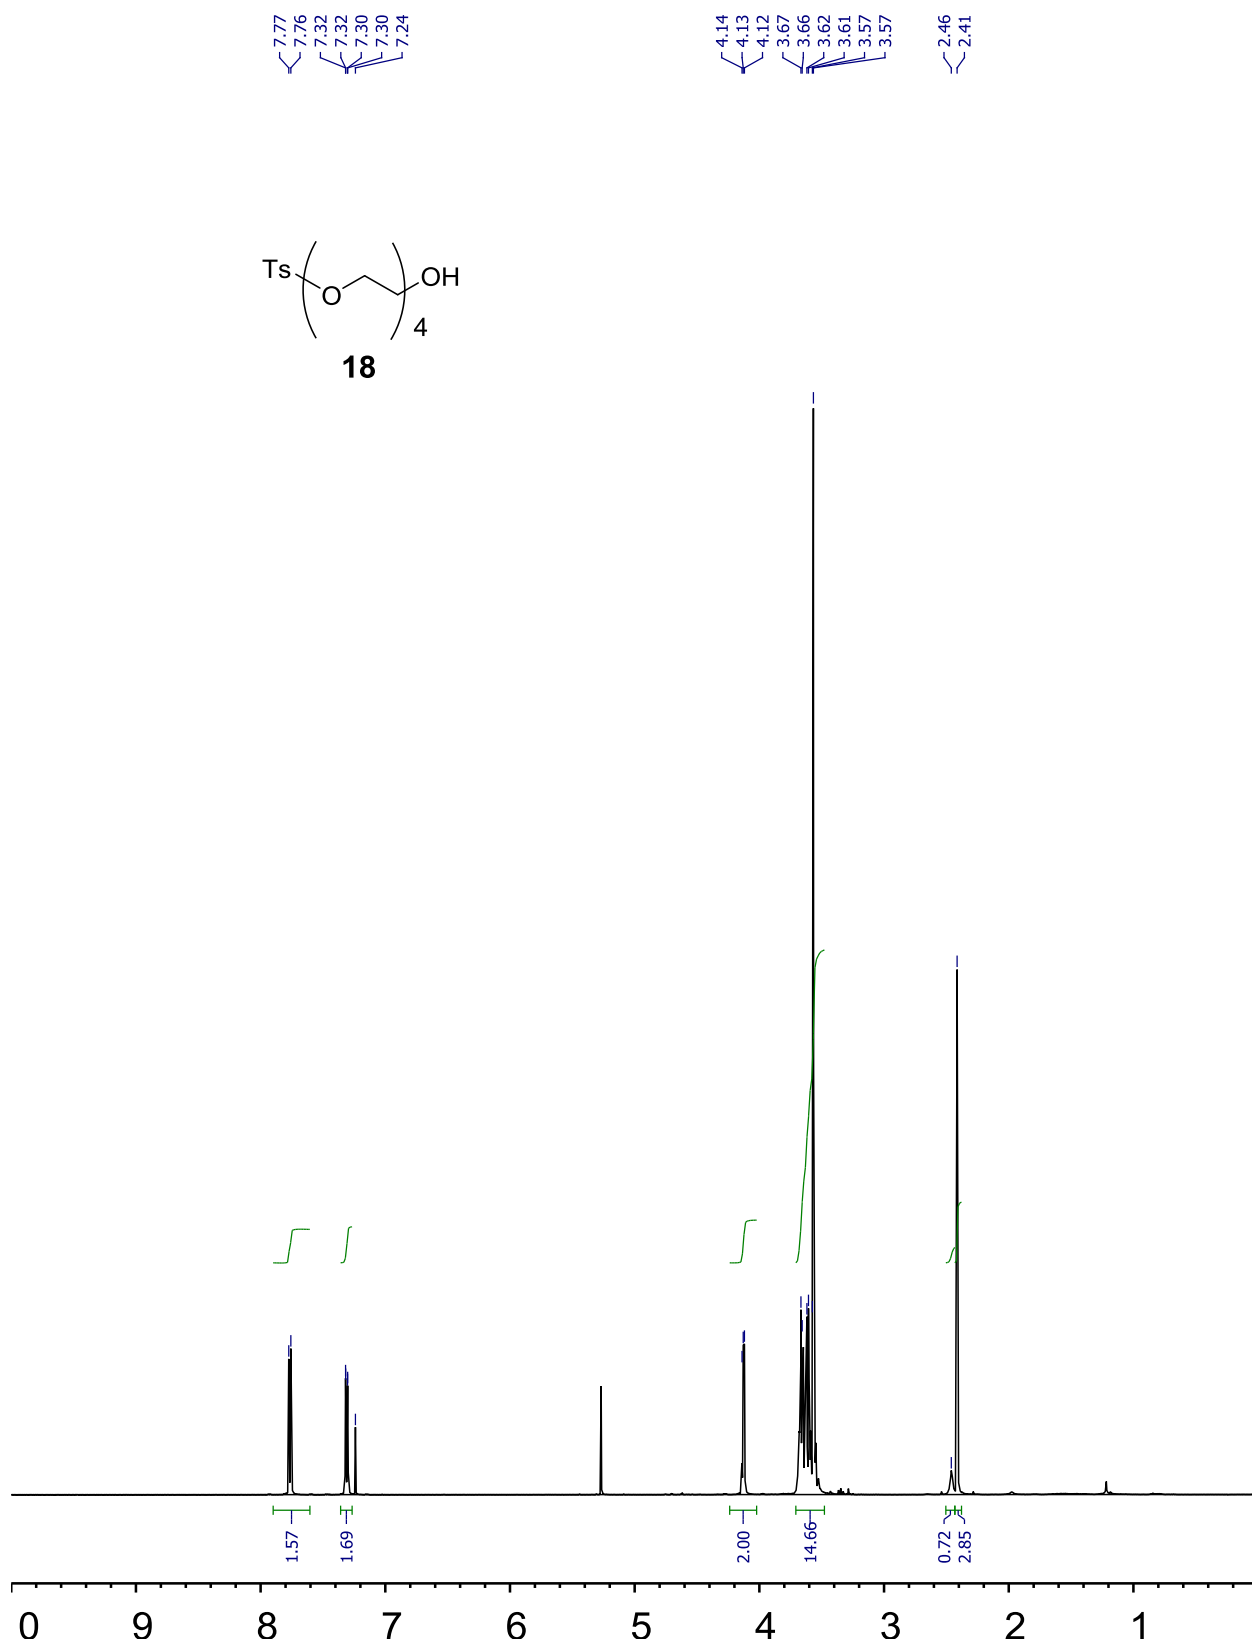

**Figure S15.**  $^1\text{H}$  NMR spectrum of **18** (CDCl<sub>3</sub>, 500 MHz).

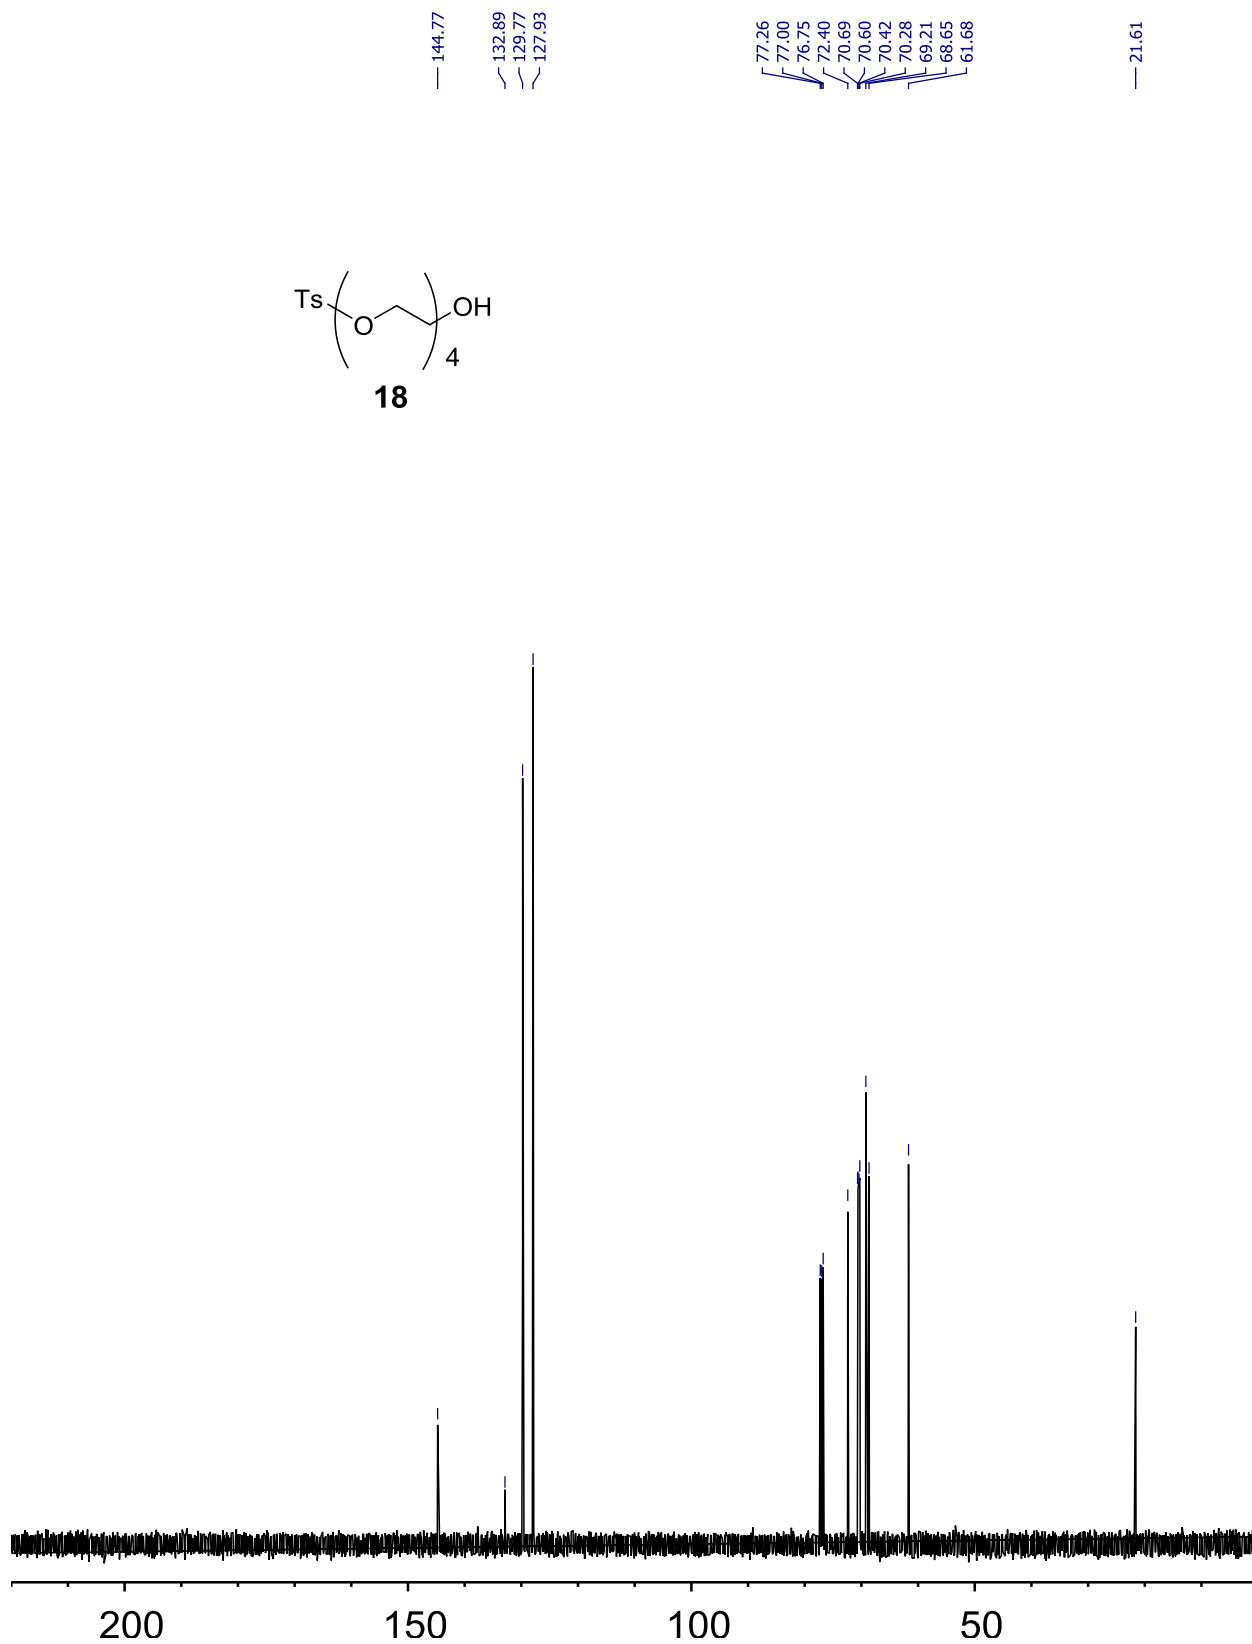

Figure S16.  $^{13}\text{C}$  NMR spectrum of **18** ( $\text{CDCl}_3$ , 125 MHz).

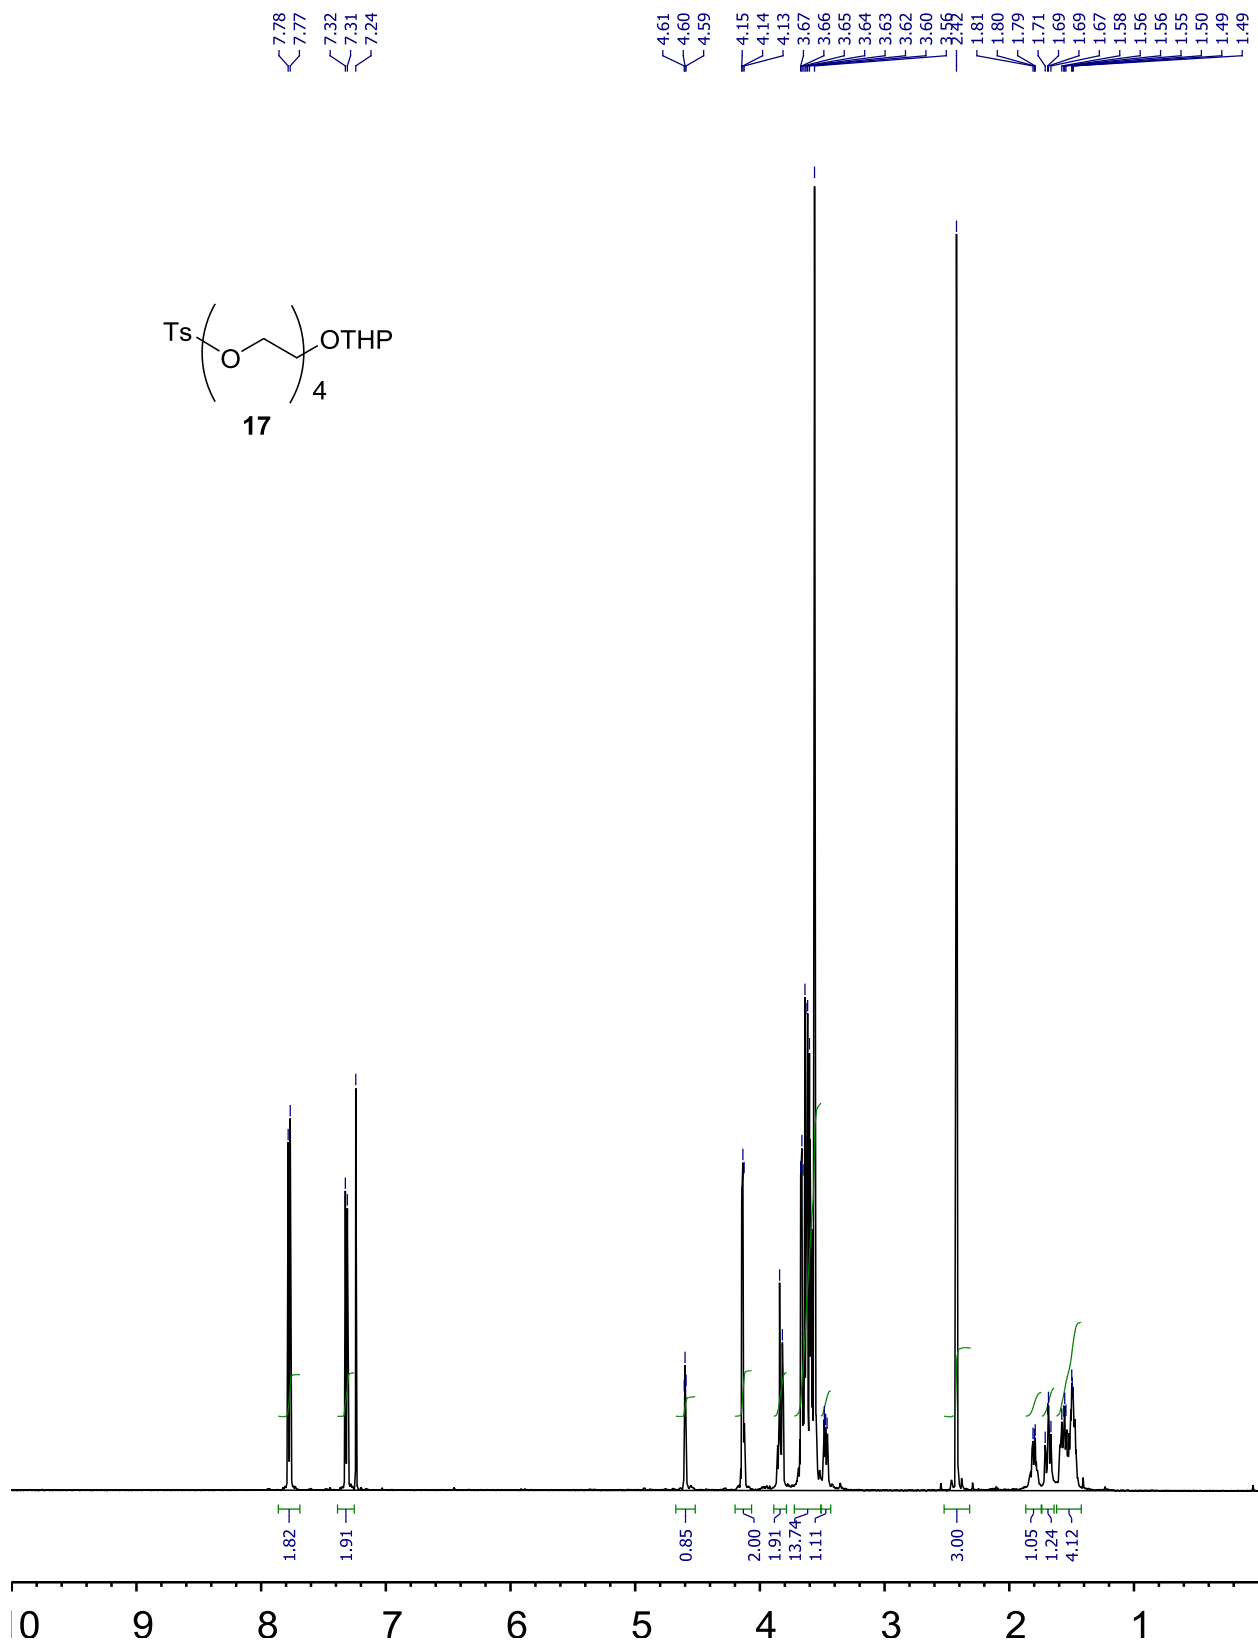

Figure S17.  $^1\text{H}$  NMR spectrum of **17** ( $\text{CDCl}_3$ , 500 MHz).

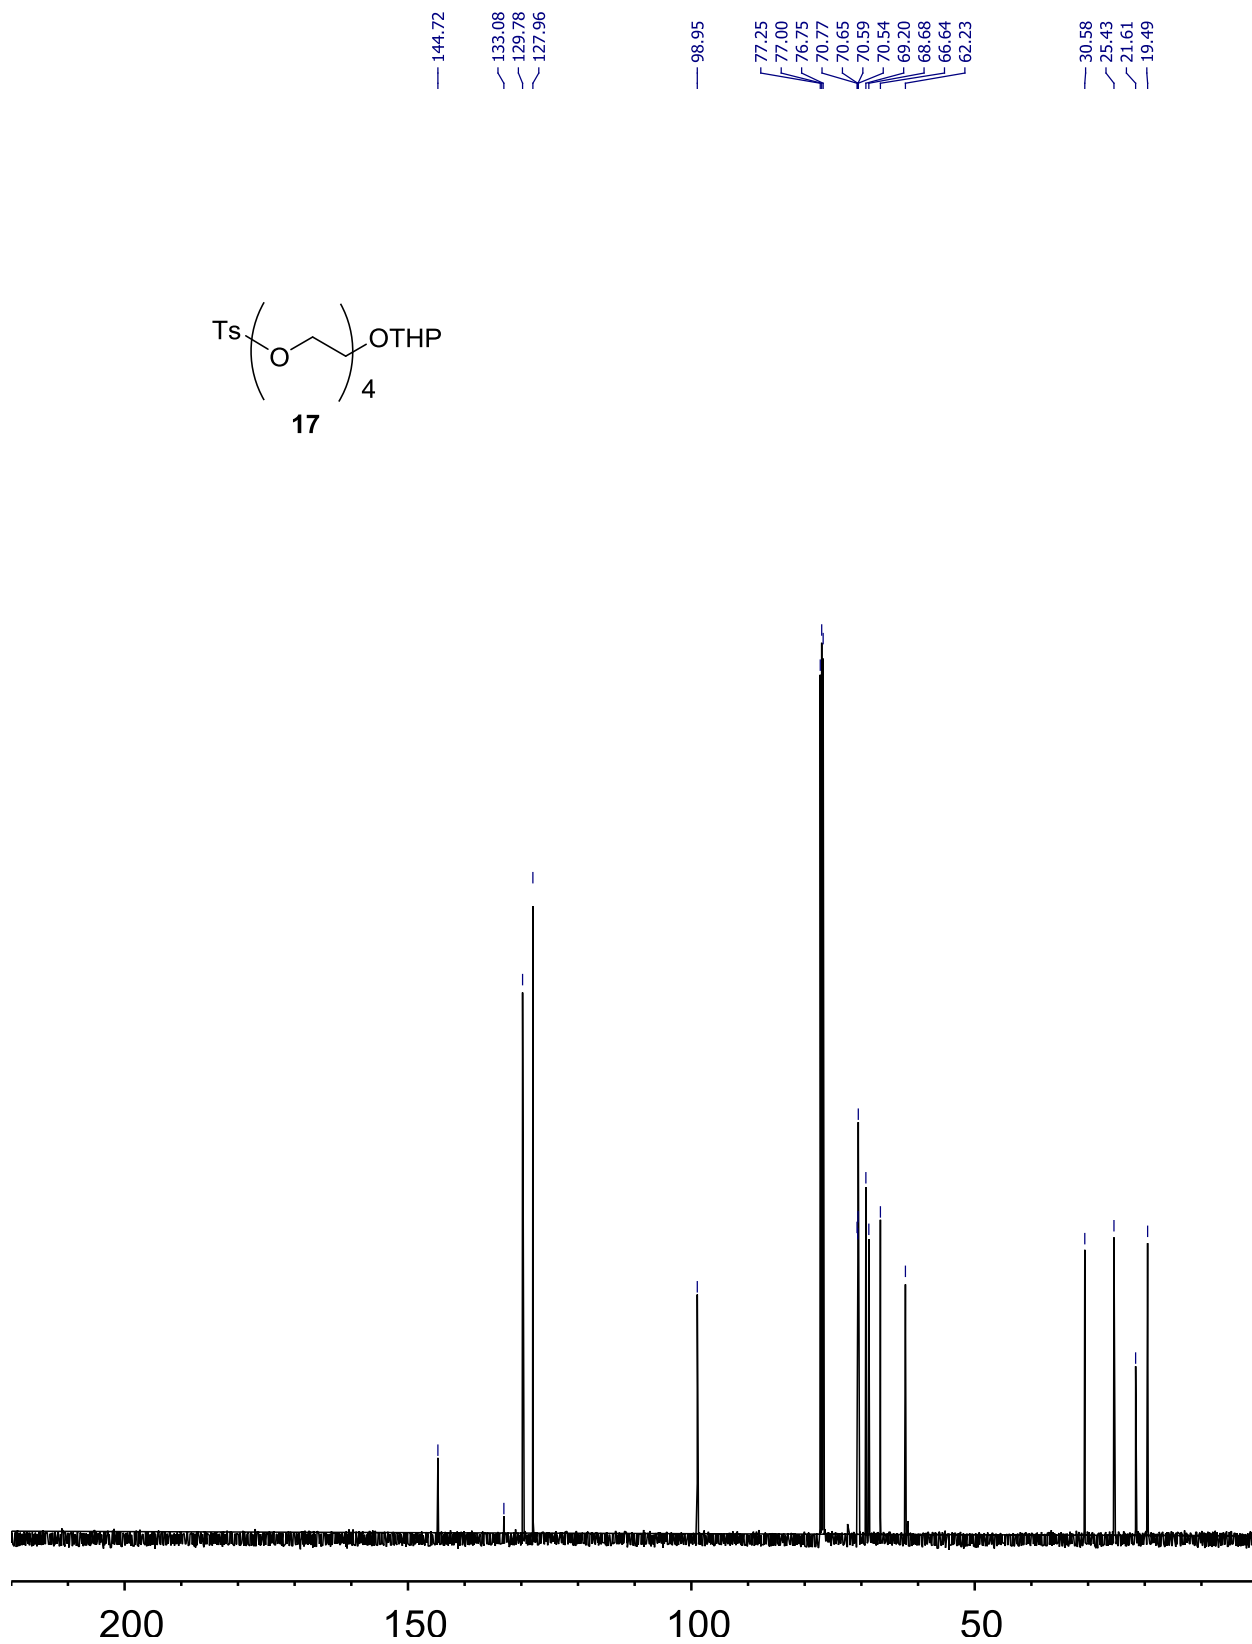

**Figure S18.** <sup>13</sup>C NMR spectrum of **17** (CDCl<sub>3</sub>, 125 MHz).

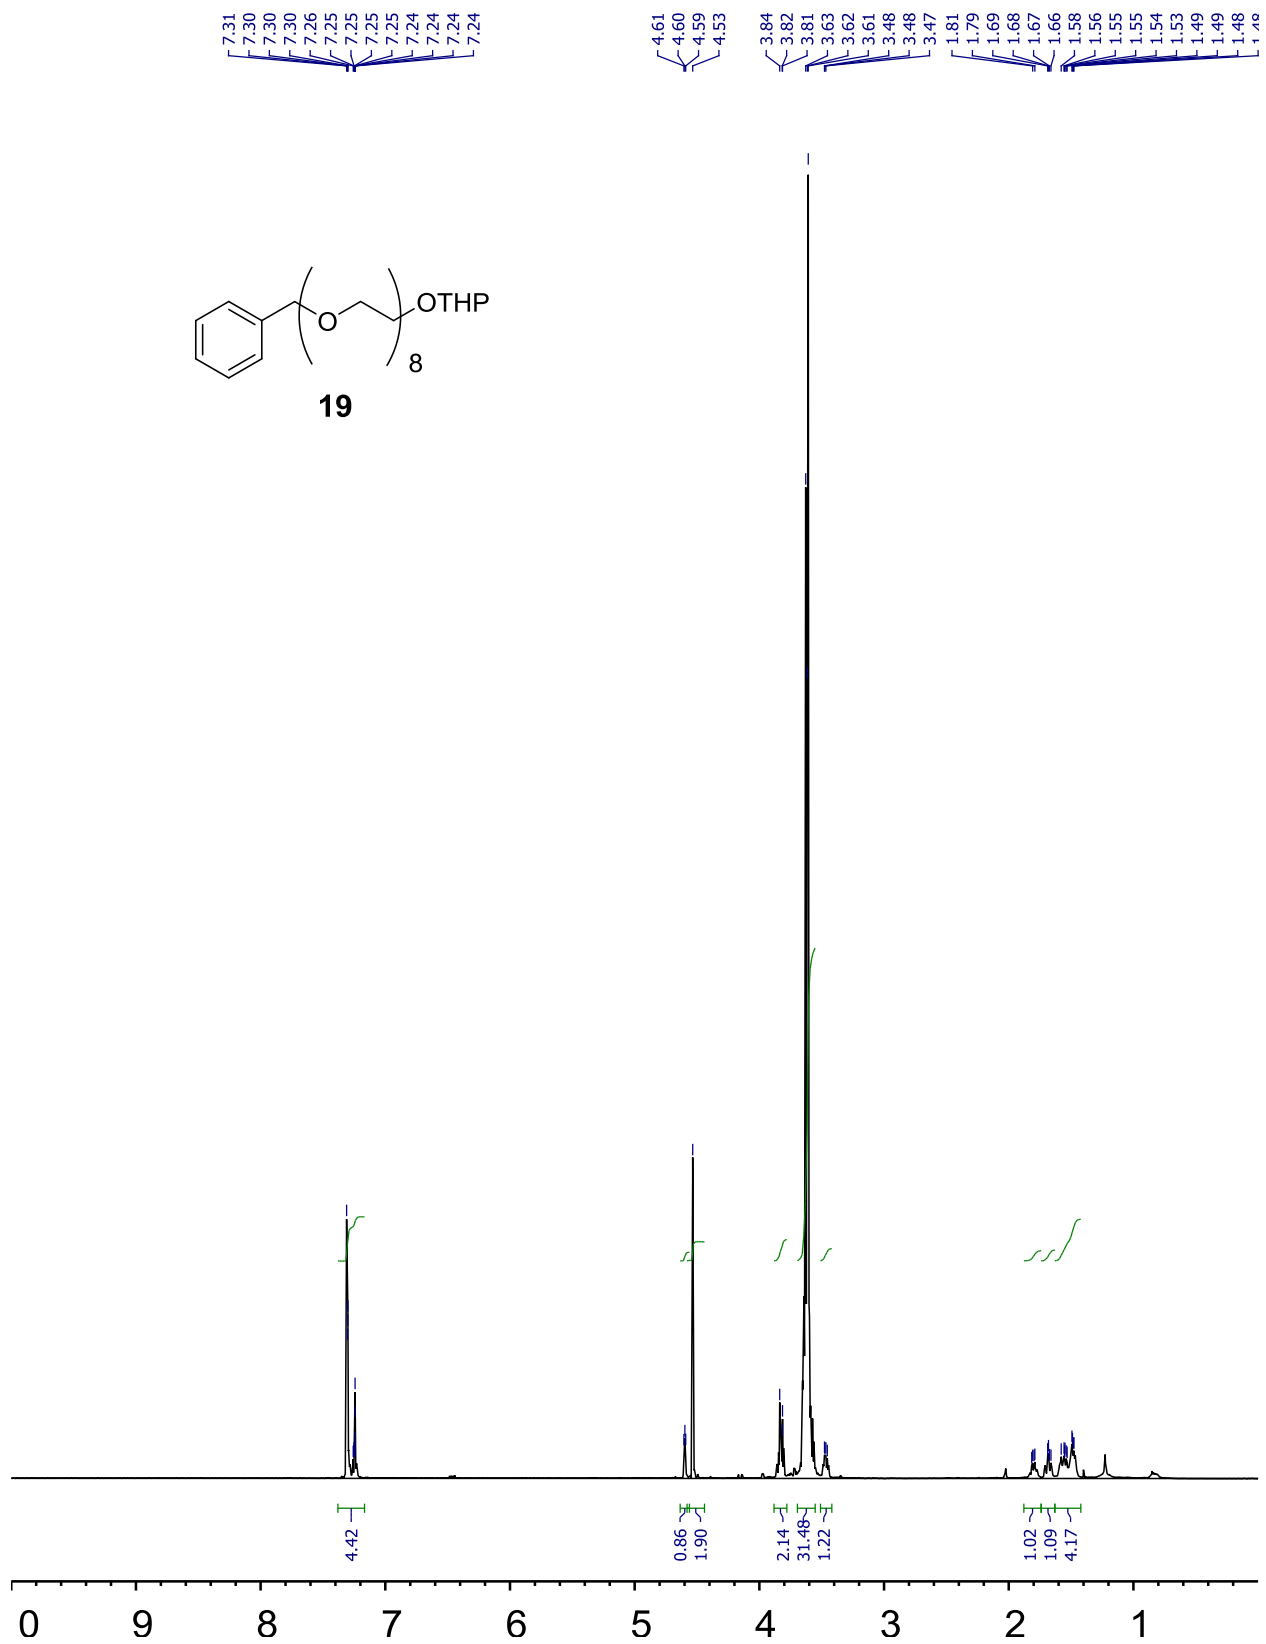

**Figure S19.**  $^1\text{H}$  NMR spectrum of **19** (CDCl<sub>3</sub>, 500 MHz).

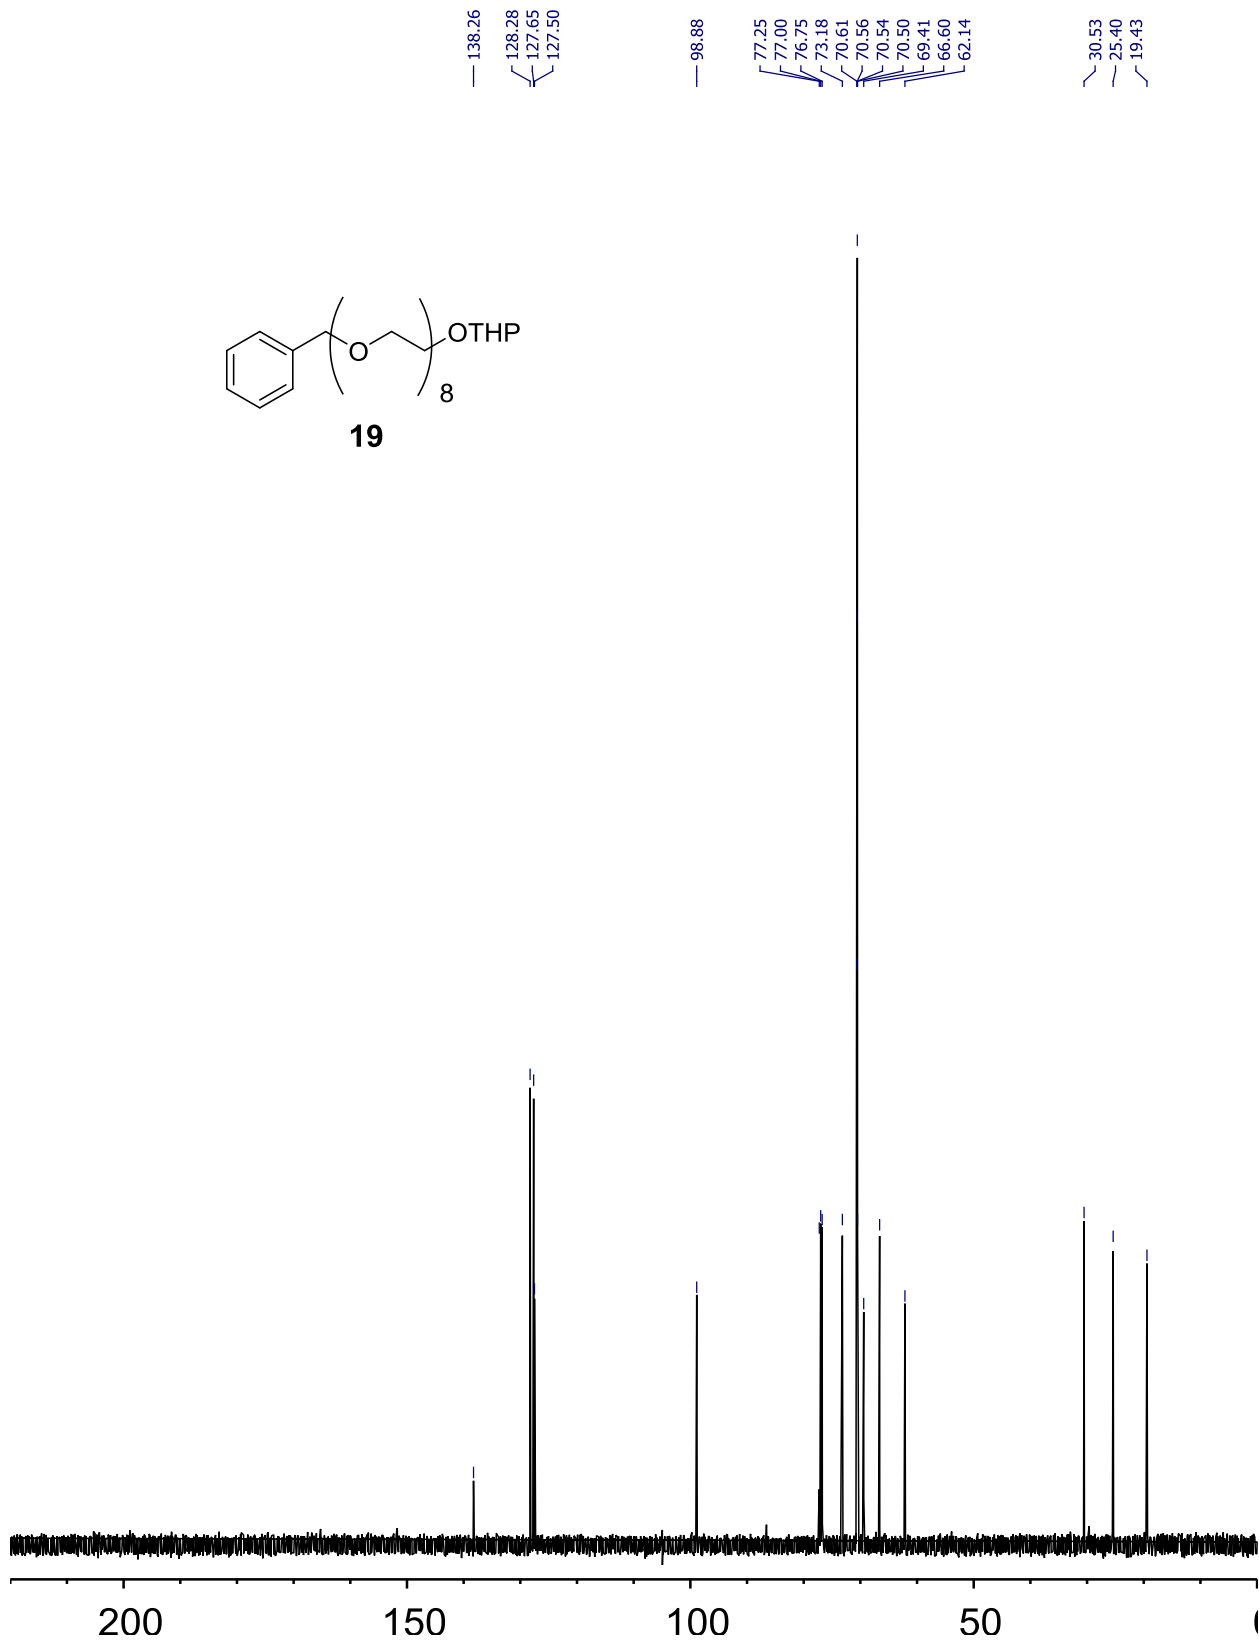

**Figure S20.**  $^{13}\text{C}$  NMR spectrum of **19** ( $\text{CDCl}_3$ , 125 MHz).

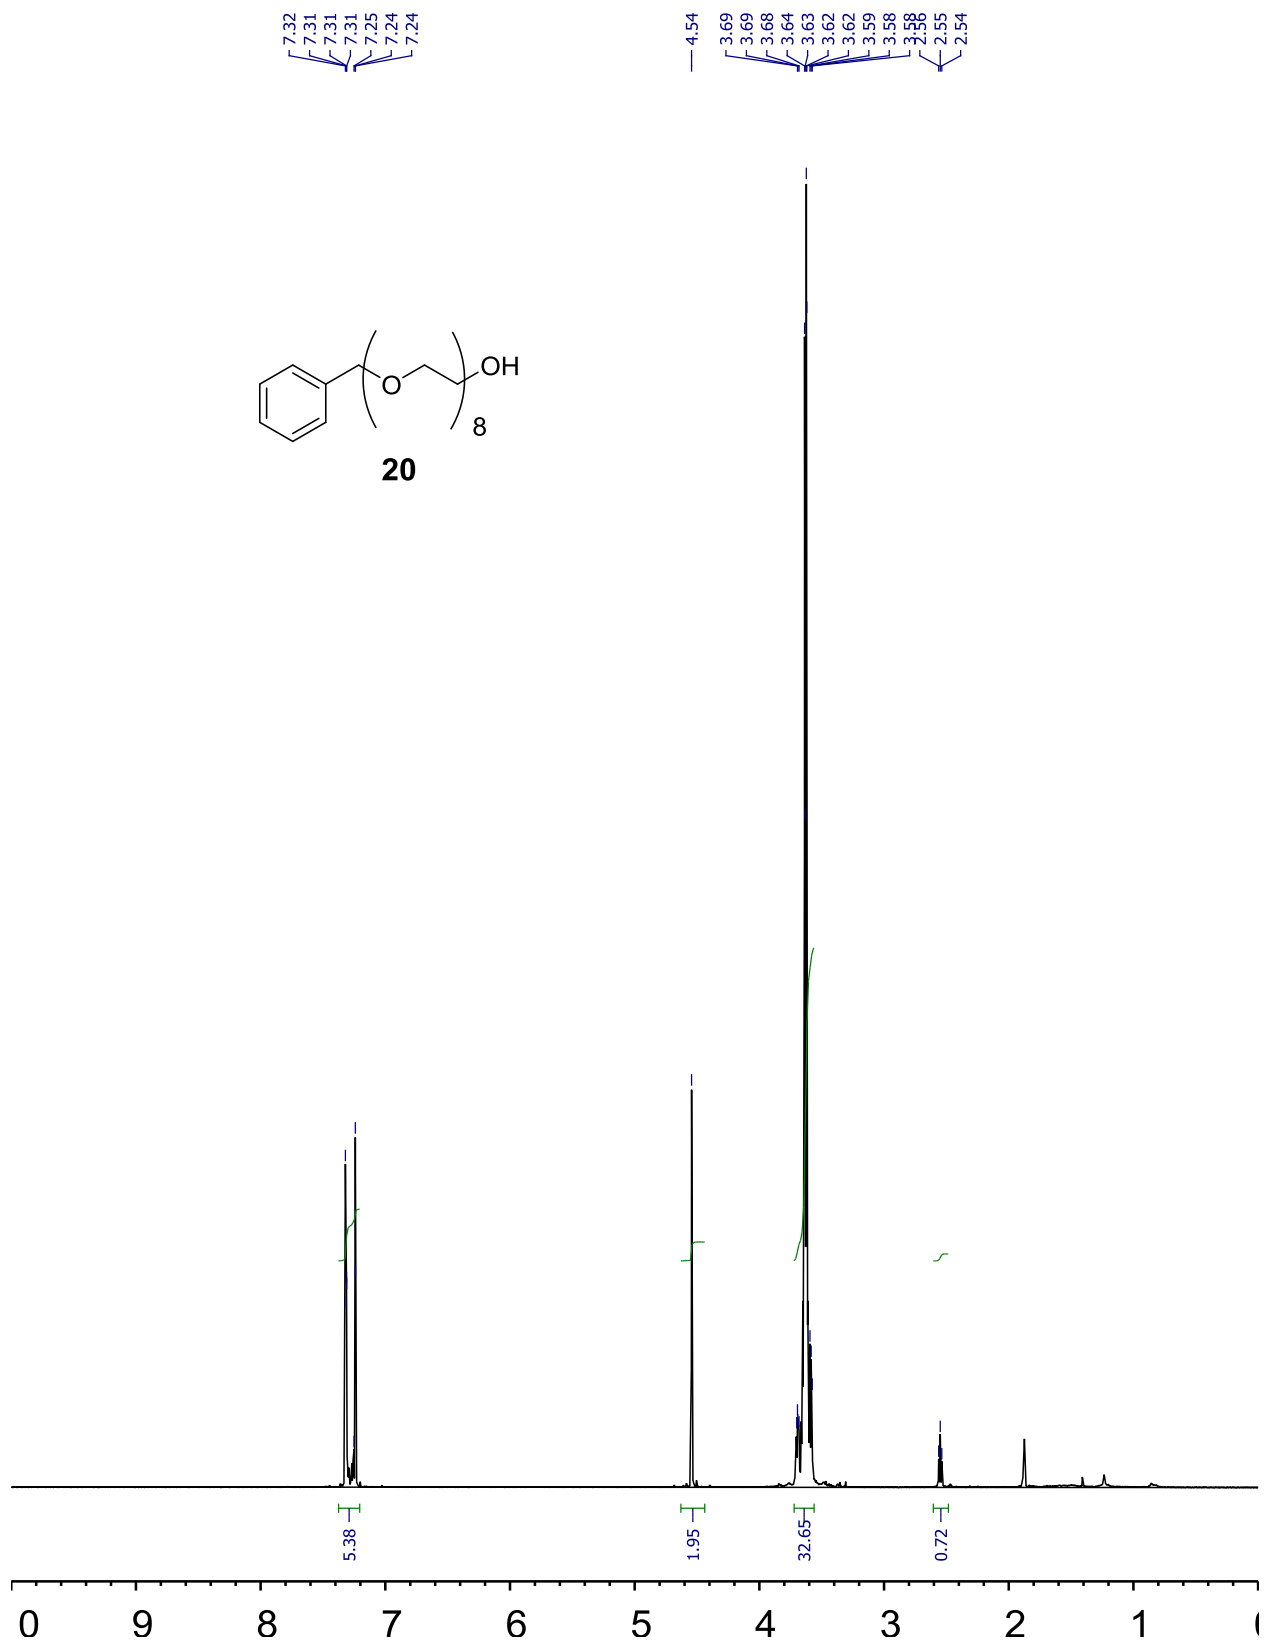

**Figure S21.** <sup>1</sup>H NMR spectrum of **20** (CDCl<sub>3</sub>, 500 MHz).

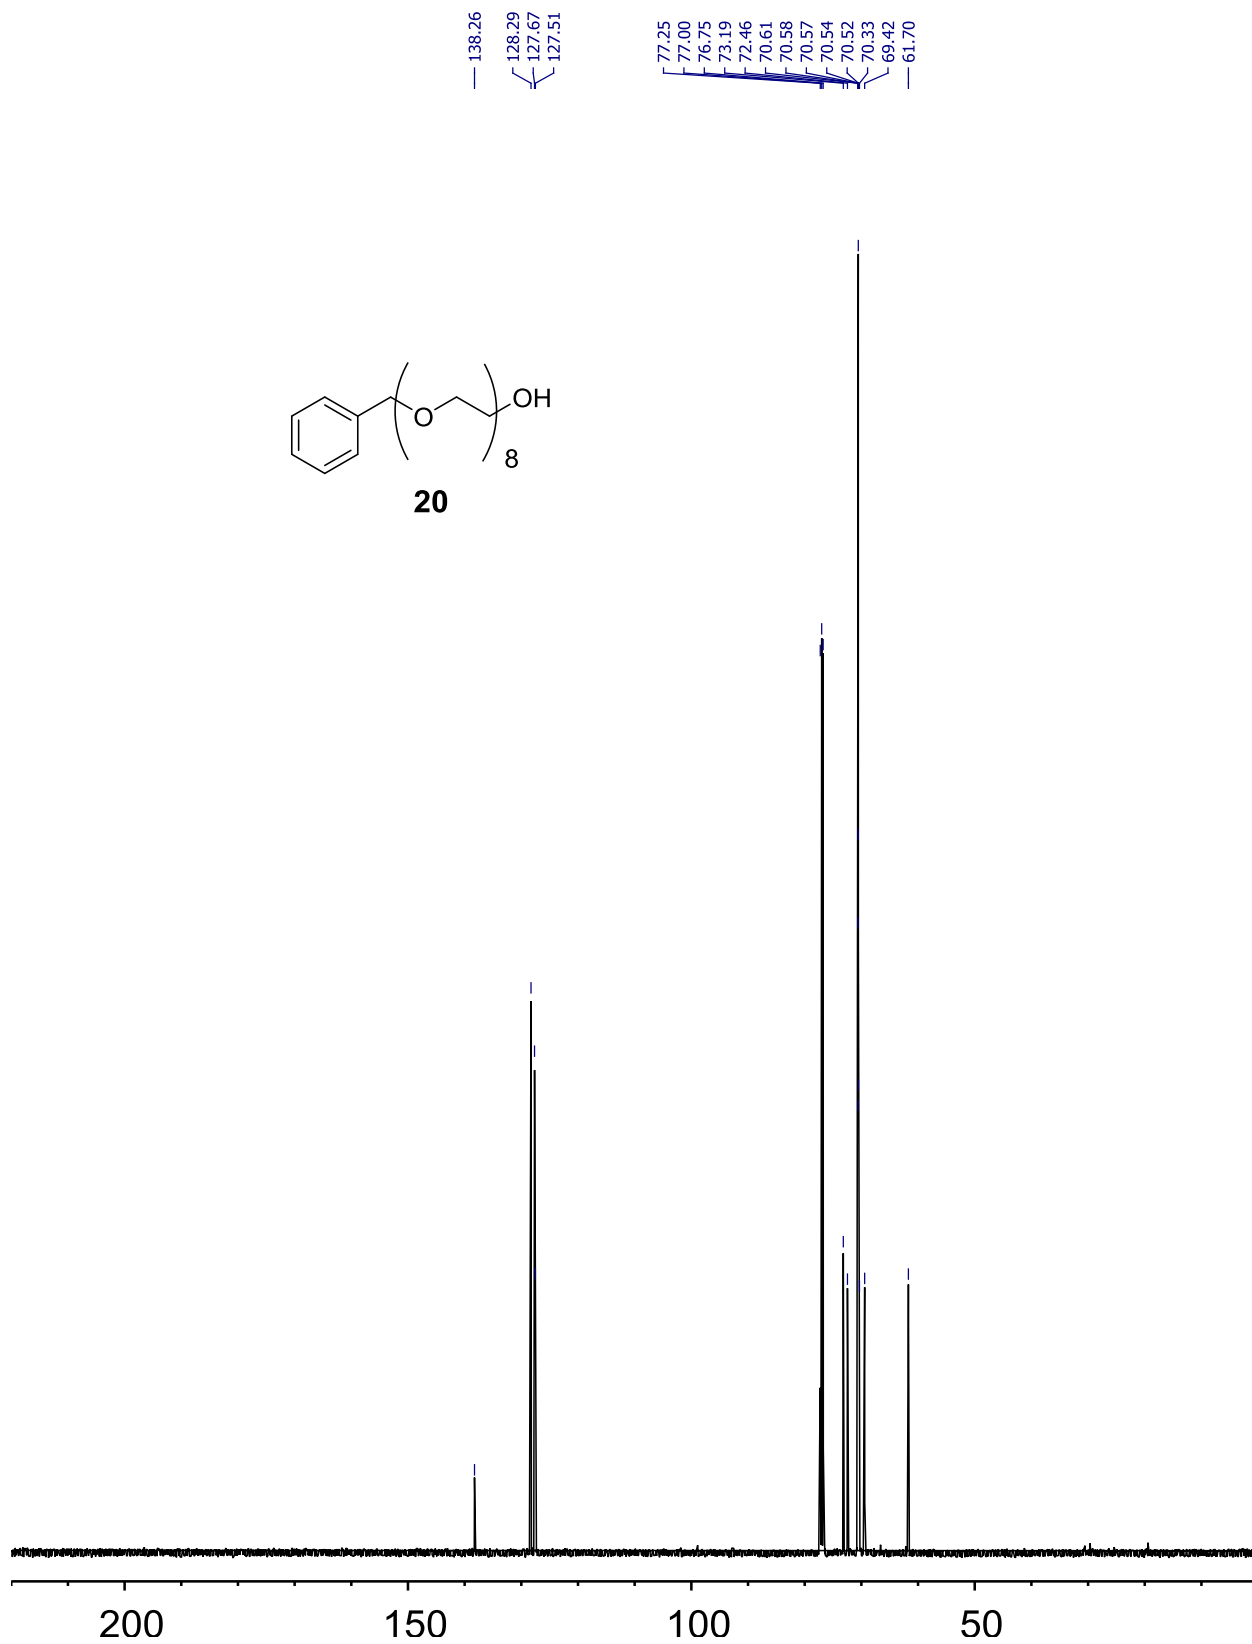

**Figure S22.**  $^{13}\text{C}$  NMR spectrum of **20** (CDCl<sub>3</sub>, 125 MHz).



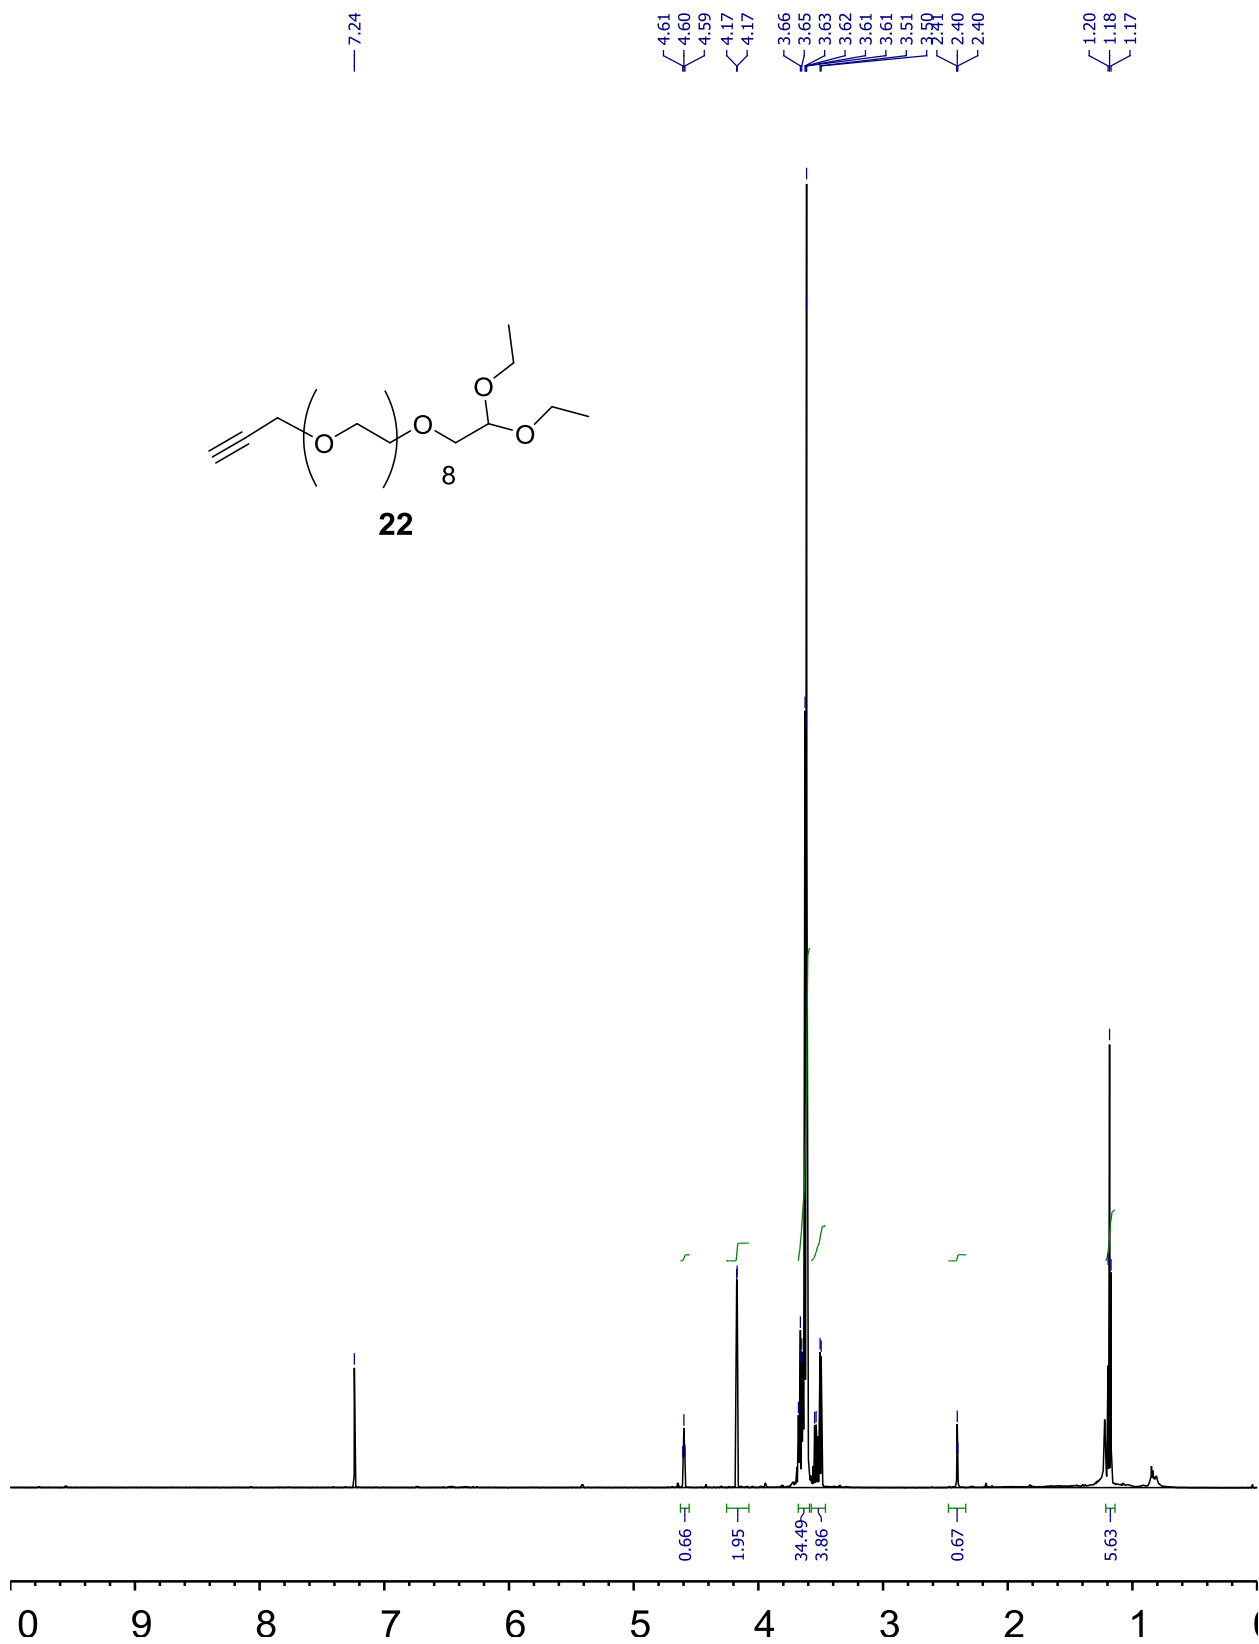

Figure S23.  $^1\text{H}$  NMR spectrum of **22** (CDCl<sub>3</sub>, 600 MHz).

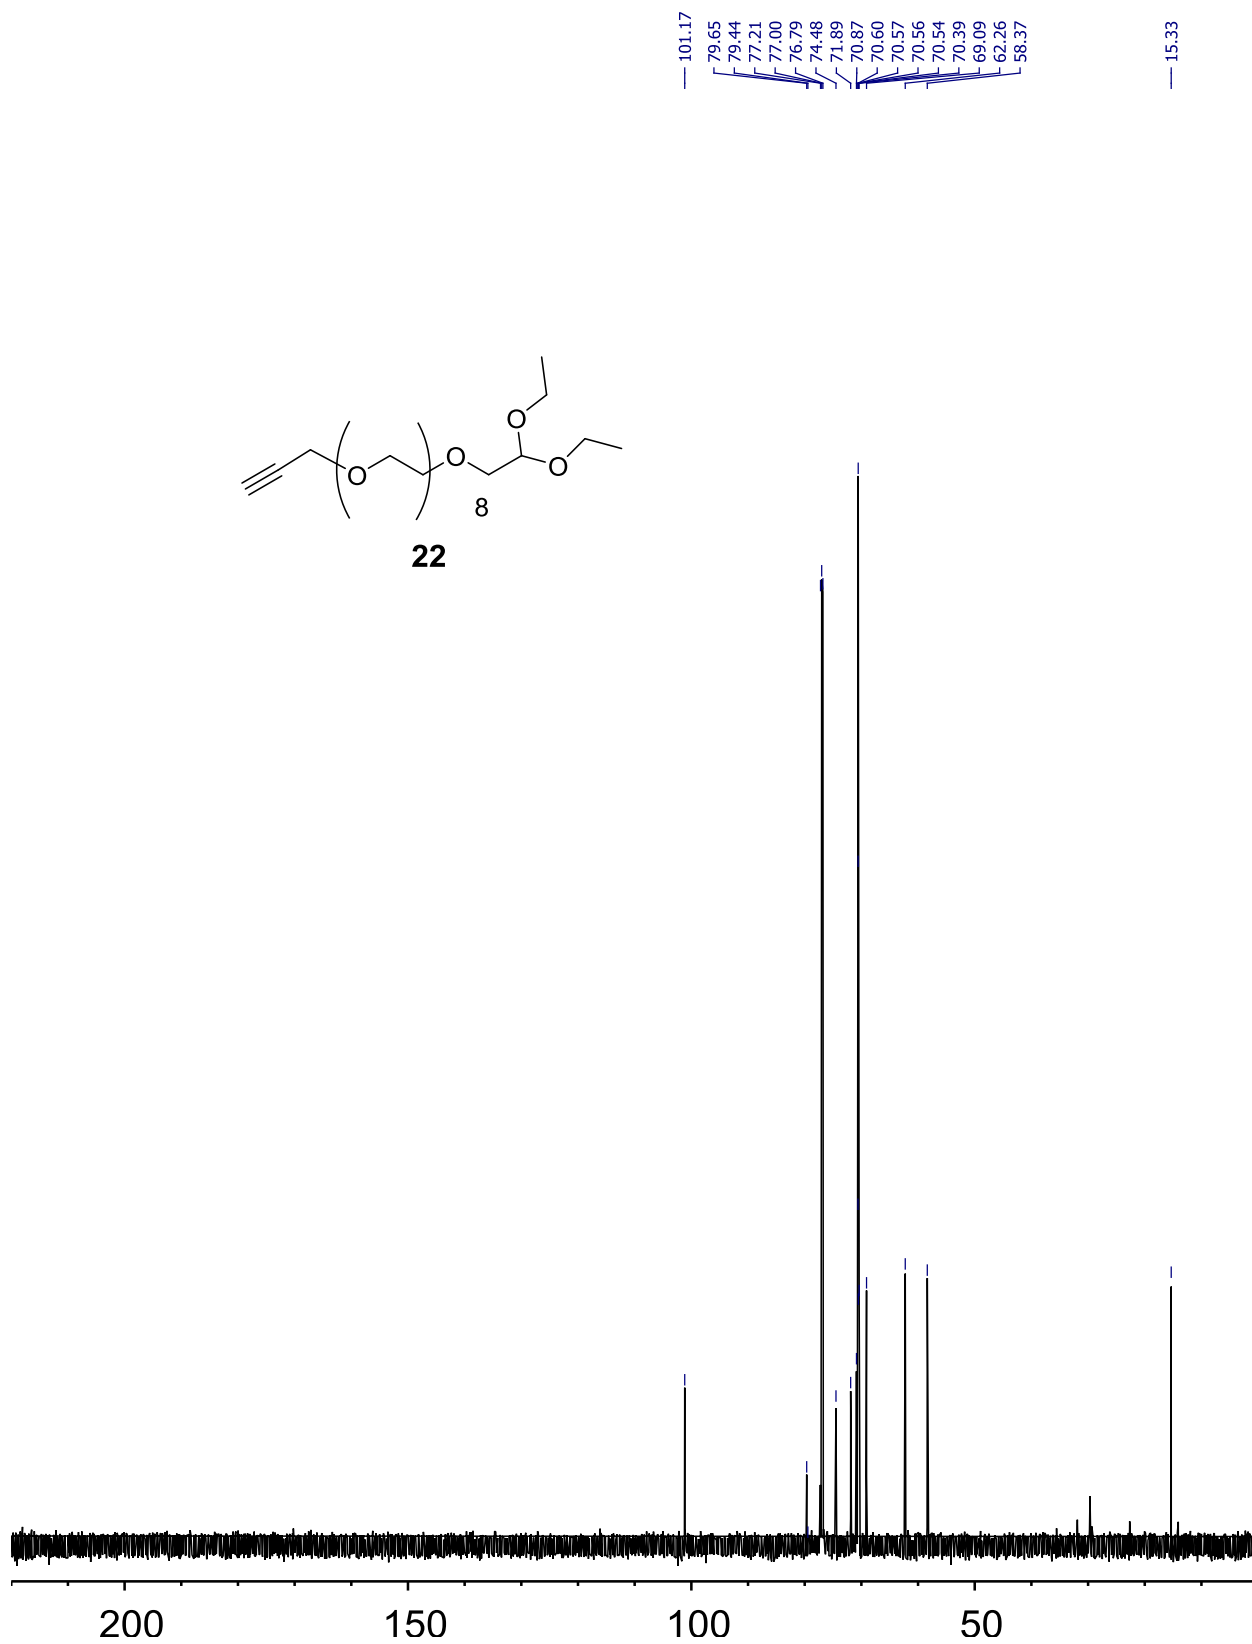

**Figure S24.** <sup>13</sup>C NMR spectrum of **22** (CDCl<sub>3</sub>, 150 MHz).

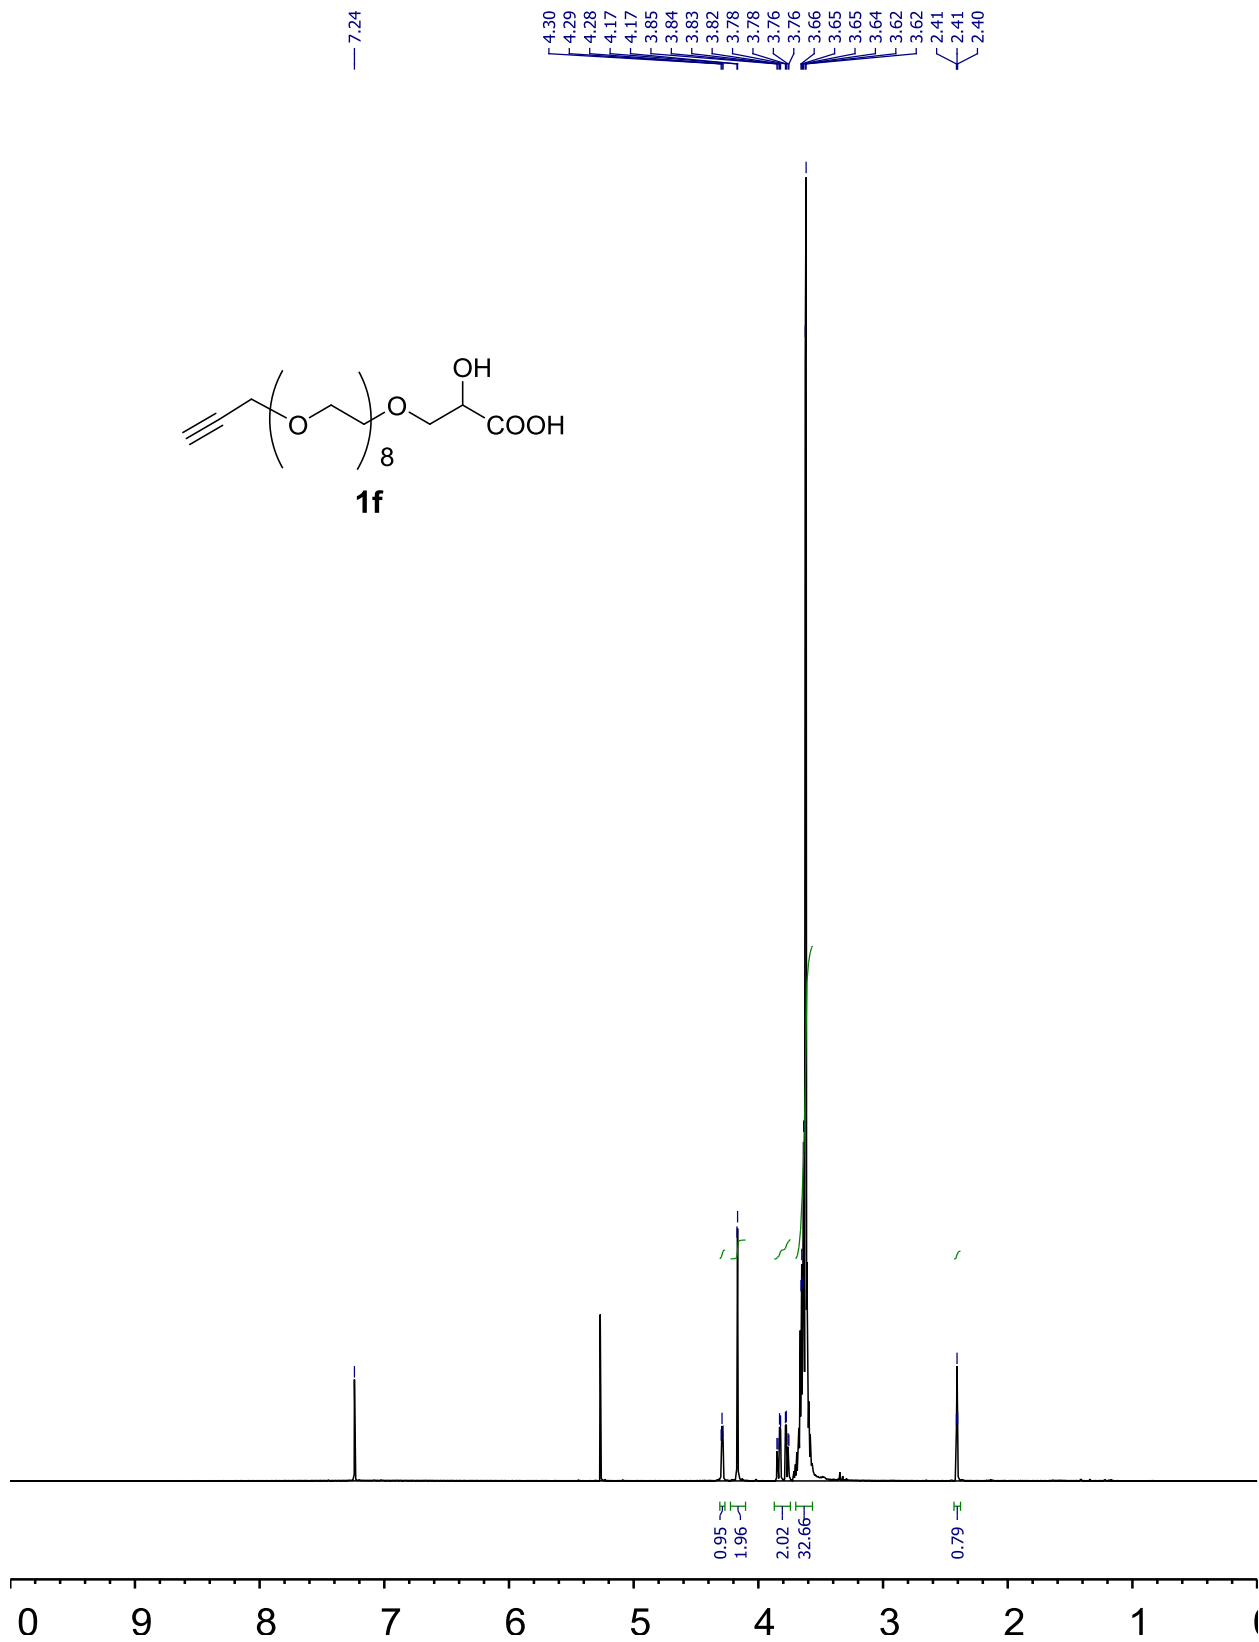

Figure S25.  $^1\text{H}$  NMR spectrum of **1f** ( $\text{CDCl}_3$ , 500 MHz).

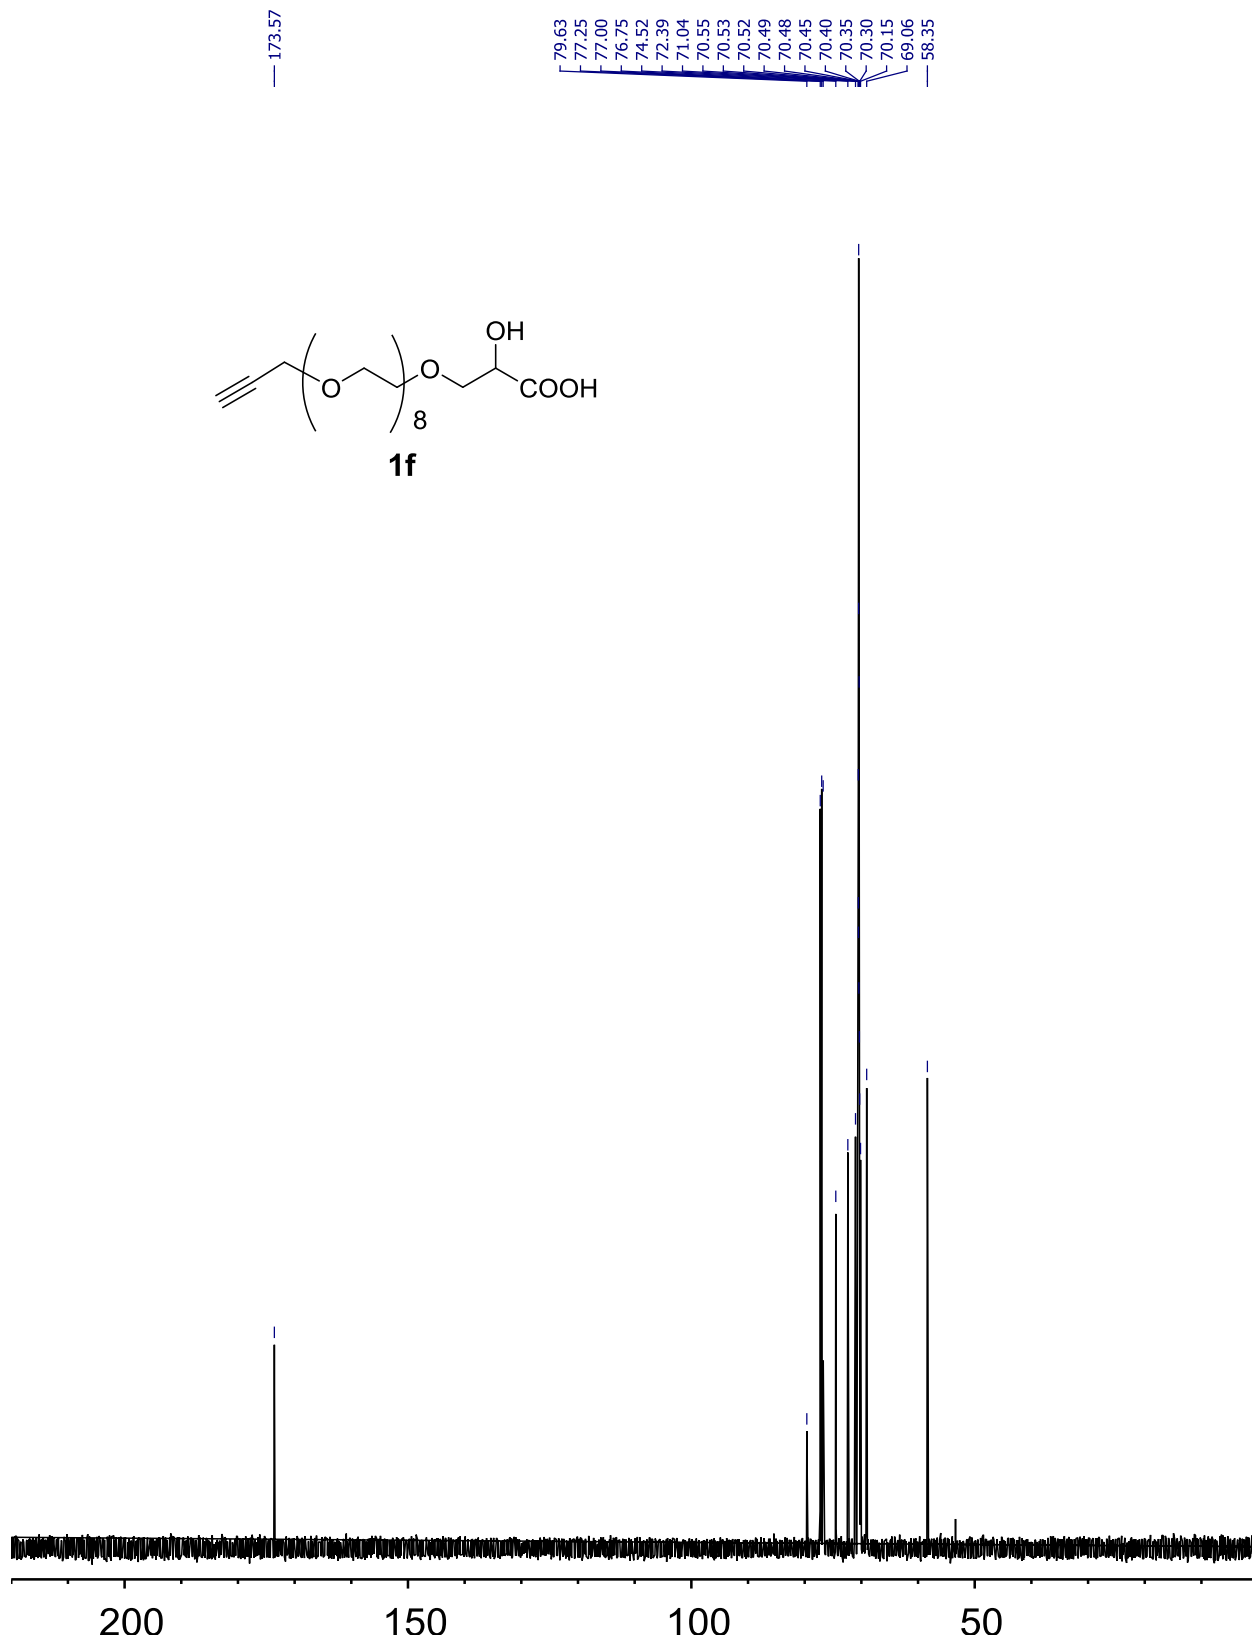

Figure S26.  $^{13}\text{C}$  NMR spectrum of **1f** ( $\text{CDCl}_3$ , 125 MHz).

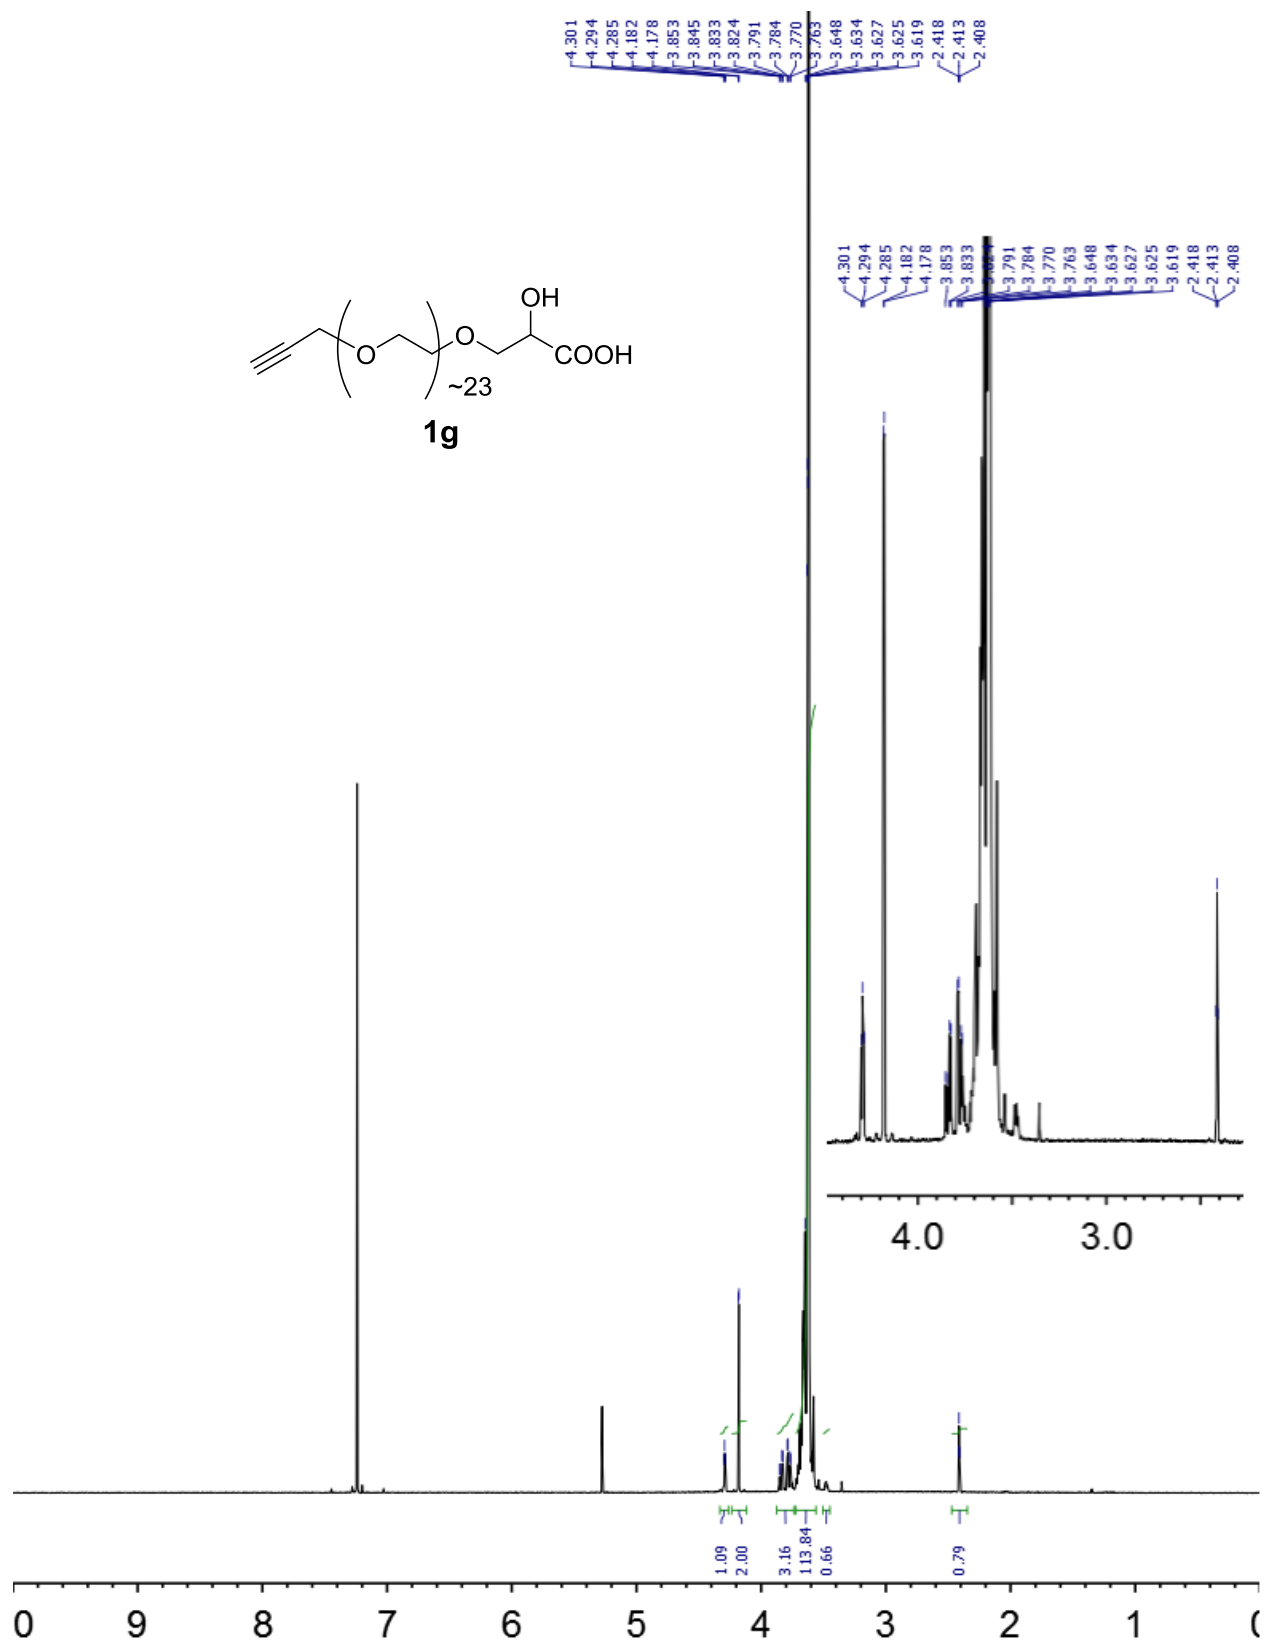

**Figure S27.** <sup>1</sup>H NMR spectrum of **1g** (CDCl<sub>3</sub>, 500 MHz).

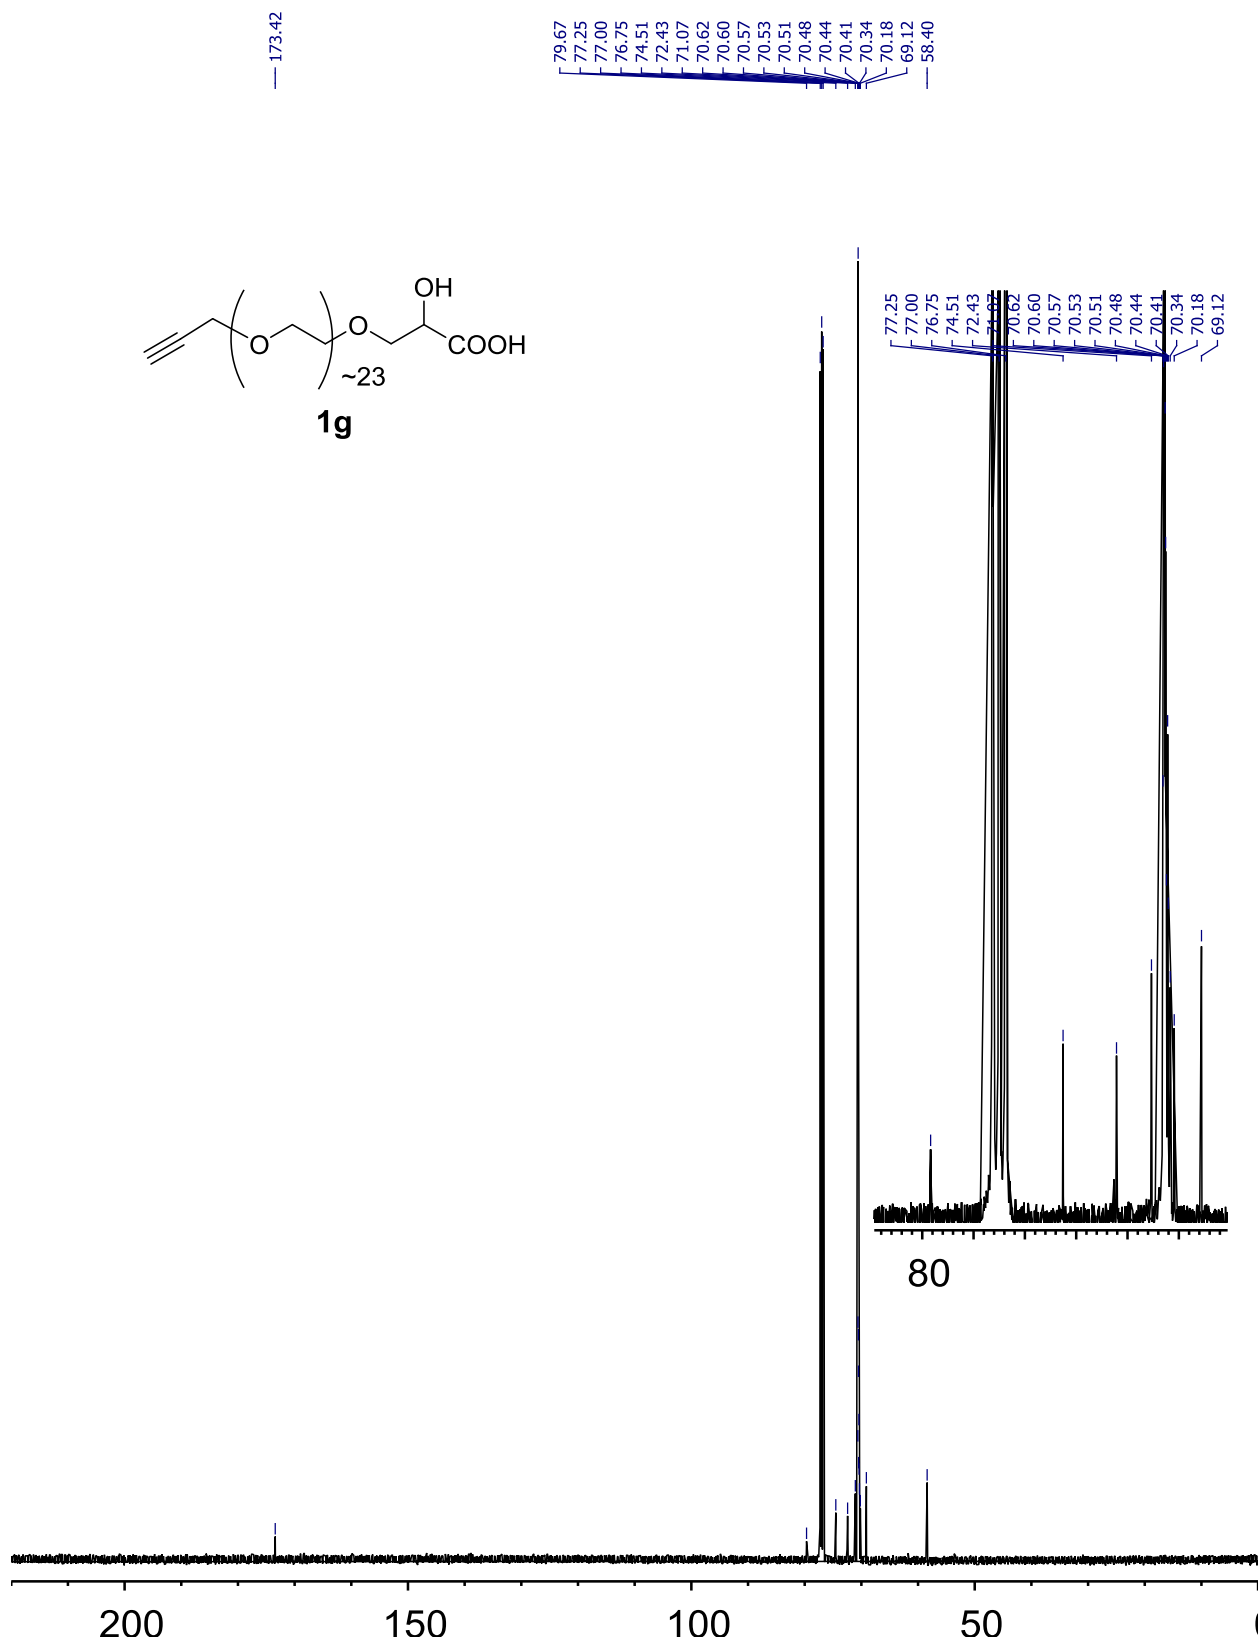

**Figure S28.**  $^{13}\text{C}$  NMR spectrum of **1g** ( $\text{CDCl}_3$ , 125 MHz).

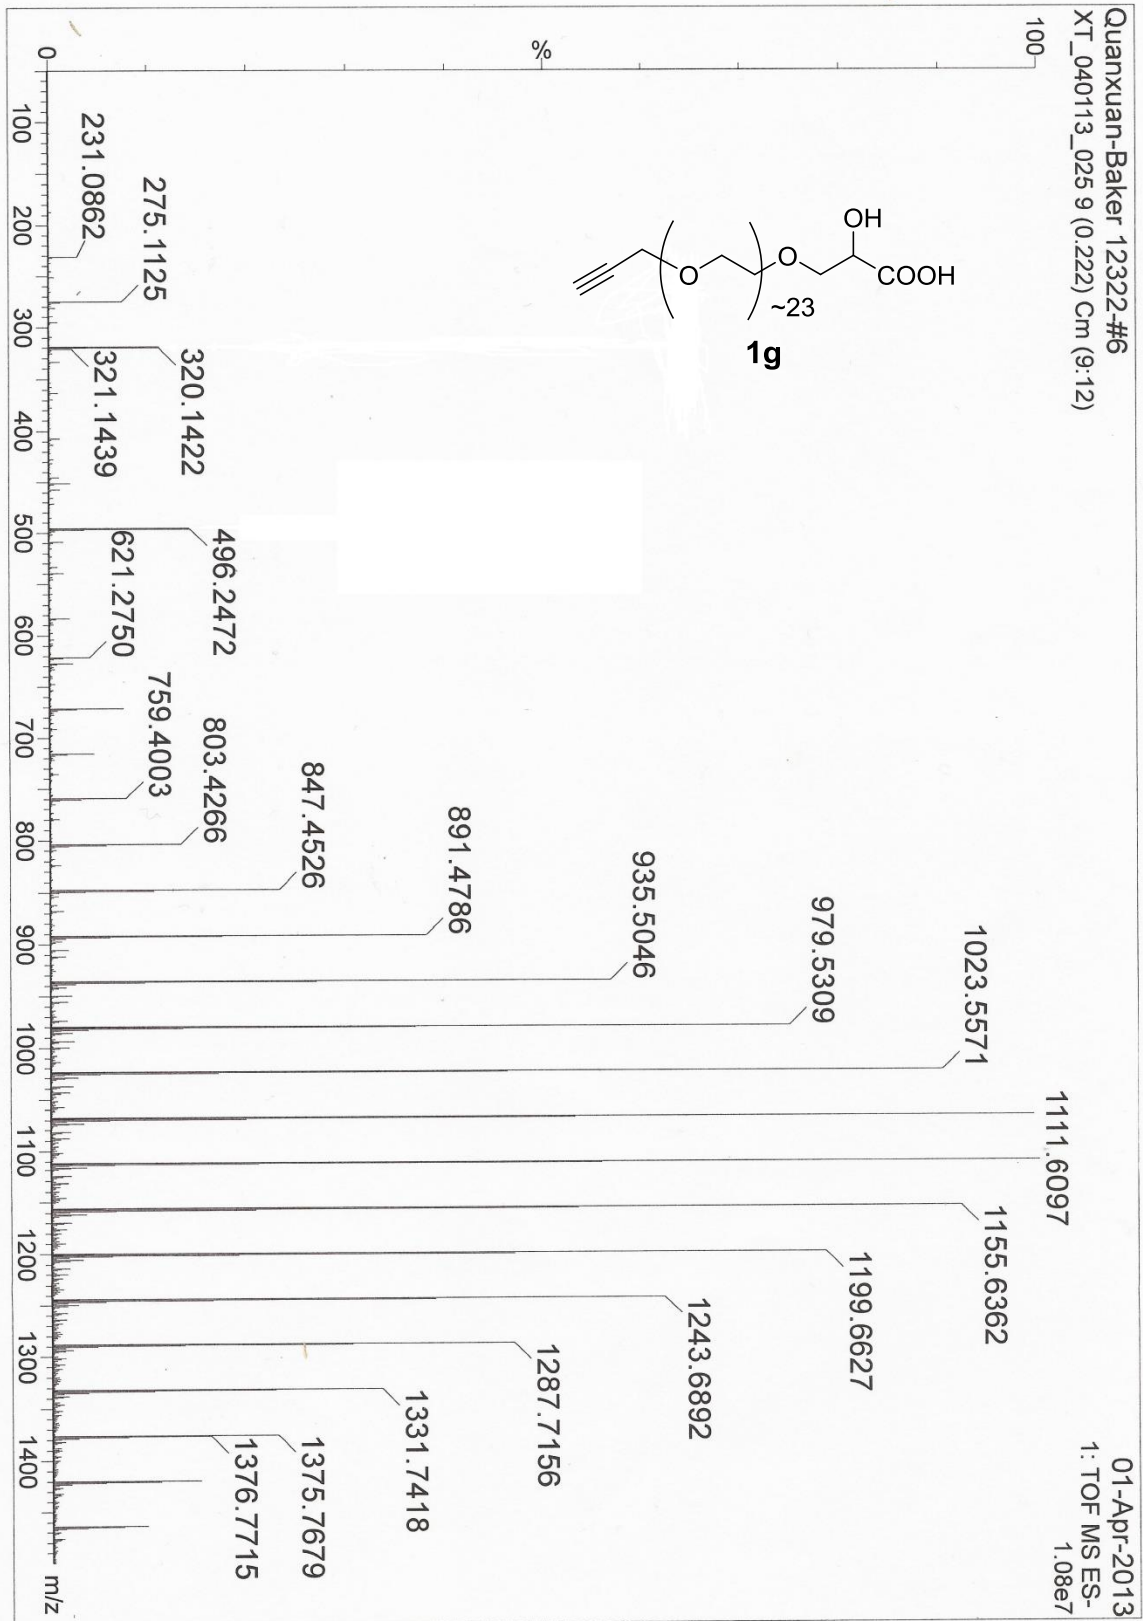

Figure S29. HRMS of 1g.

**Table S1. Exact Mass of 1g from HRMS Peaks<sup>a</sup>**

| n  | Formula                                          |                                                  | Calcd for [M-H] <sup>-</sup> | Found for [M-H] <sup>-</sup> |
|----|--------------------------------------------------|--------------------------------------------------|------------------------------|------------------------------|
|    | M                                                | [M-H] <sup>-</sup>                               |                              |                              |
| 14 | C <sub>34</sub> H <sub>64</sub> O <sub>18</sub>  | C <sub>34</sub> H <sub>63</sub> O <sub>18</sub>  | 759.4013                     | 759.4003                     |
| 15 | C <sub>36</sub> H <sub>68</sub> O <sub>19</sub>  | C <sub>36</sub> H <sub>67</sub> O <sub>19</sub>  | 803.4275                     | 803.4266                     |
| 16 | C <sub>38</sub> H <sub>72</sub> O <sub>20</sub>  | C <sub>38</sub> H <sub>71</sub> O <sub>20</sub>  | 847.4537                     | 847.4526                     |
| 17 | C <sub>40</sub> H <sub>76</sub> O <sub>21</sub>  | C <sub>40</sub> H <sub>75</sub> O <sub>21</sub>  | 891.4799                     | 891.4786                     |
| 18 | C <sub>42</sub> H <sub>80</sub> O <sub>22</sub>  | C <sub>42</sub> H <sub>79</sub> O <sub>22</sub>  | 935.5061                     | 935.5046                     |
| 19 | C <sub>44</sub> H <sub>84</sub> O <sub>23</sub>  | C <sub>44</sub> H <sub>83</sub> O <sub>23</sub>  | 979.5323                     | 979.5309                     |
| 20 | C <sub>46</sub> H <sub>88</sub> O <sub>24</sub>  | C <sub>46</sub> H <sub>87</sub> O <sub>24</sub>  | 1023.5585                    | 1023.5571                    |
| 21 | C <sub>48</sub> H <sub>92</sub> O <sub>25</sub>  | C <sub>48</sub> H <sub>91</sub> O <sub>25</sub>  | 1067.5847                    | -- <sup>b</sup>              |
| 22 | C <sub>50</sub> H <sub>96</sub> O <sub>26</sub>  | C <sub>50</sub> H <sub>95</sub> O <sub>26</sub>  | 1111.6109                    | 1111.6097                    |
| 23 | C <sub>52</sub> H <sub>100</sub> O <sub>27</sub> | C <sub>52</sub> H <sub>99</sub> O <sub>27</sub>  | 1155.6371                    | 1155.6362                    |
| 24 | C <sub>54</sub> H <sub>104</sub> O <sub>28</sub> | C <sub>54</sub> H <sub>103</sub> O <sub>28</sub> | 1199.6633                    | 1199.6627                    |
| 25 | C <sub>56</sub> H <sub>108</sub> O <sub>29</sub> | C <sub>56</sub> H <sub>107</sub> O <sub>29</sub> | 1243.6895                    | 1243.6892                    |
| 26 | C <sub>58</sub> H <sub>112</sub> O <sub>30</sub> | C <sub>58</sub> H <sub>111</sub> O <sub>30</sub> | 1287.7157                    | 1287.7156                    |
| 27 | C <sub>60</sub> H <sub>116</sub> O <sub>31</sub> | C <sub>60</sub> H <sub>115</sub> O <sub>31</sub> | 1331.7419                    | 1331.7418                    |
| 28 | C <sub>62</sub> H <sub>120</sub> O <sub>32</sub> | C <sub>62</sub> H <sub>119</sub> O <sub>32</sub> | 1375.7681                    | 1375.7679                    |

<sup>a</sup> Mass data of **1g** are calculated or extracted from HRMS (**Figure S29**). <sup>b</sup> Exact mass was not reported by HRMS of **1g** possibly due to the overcrowded printing .



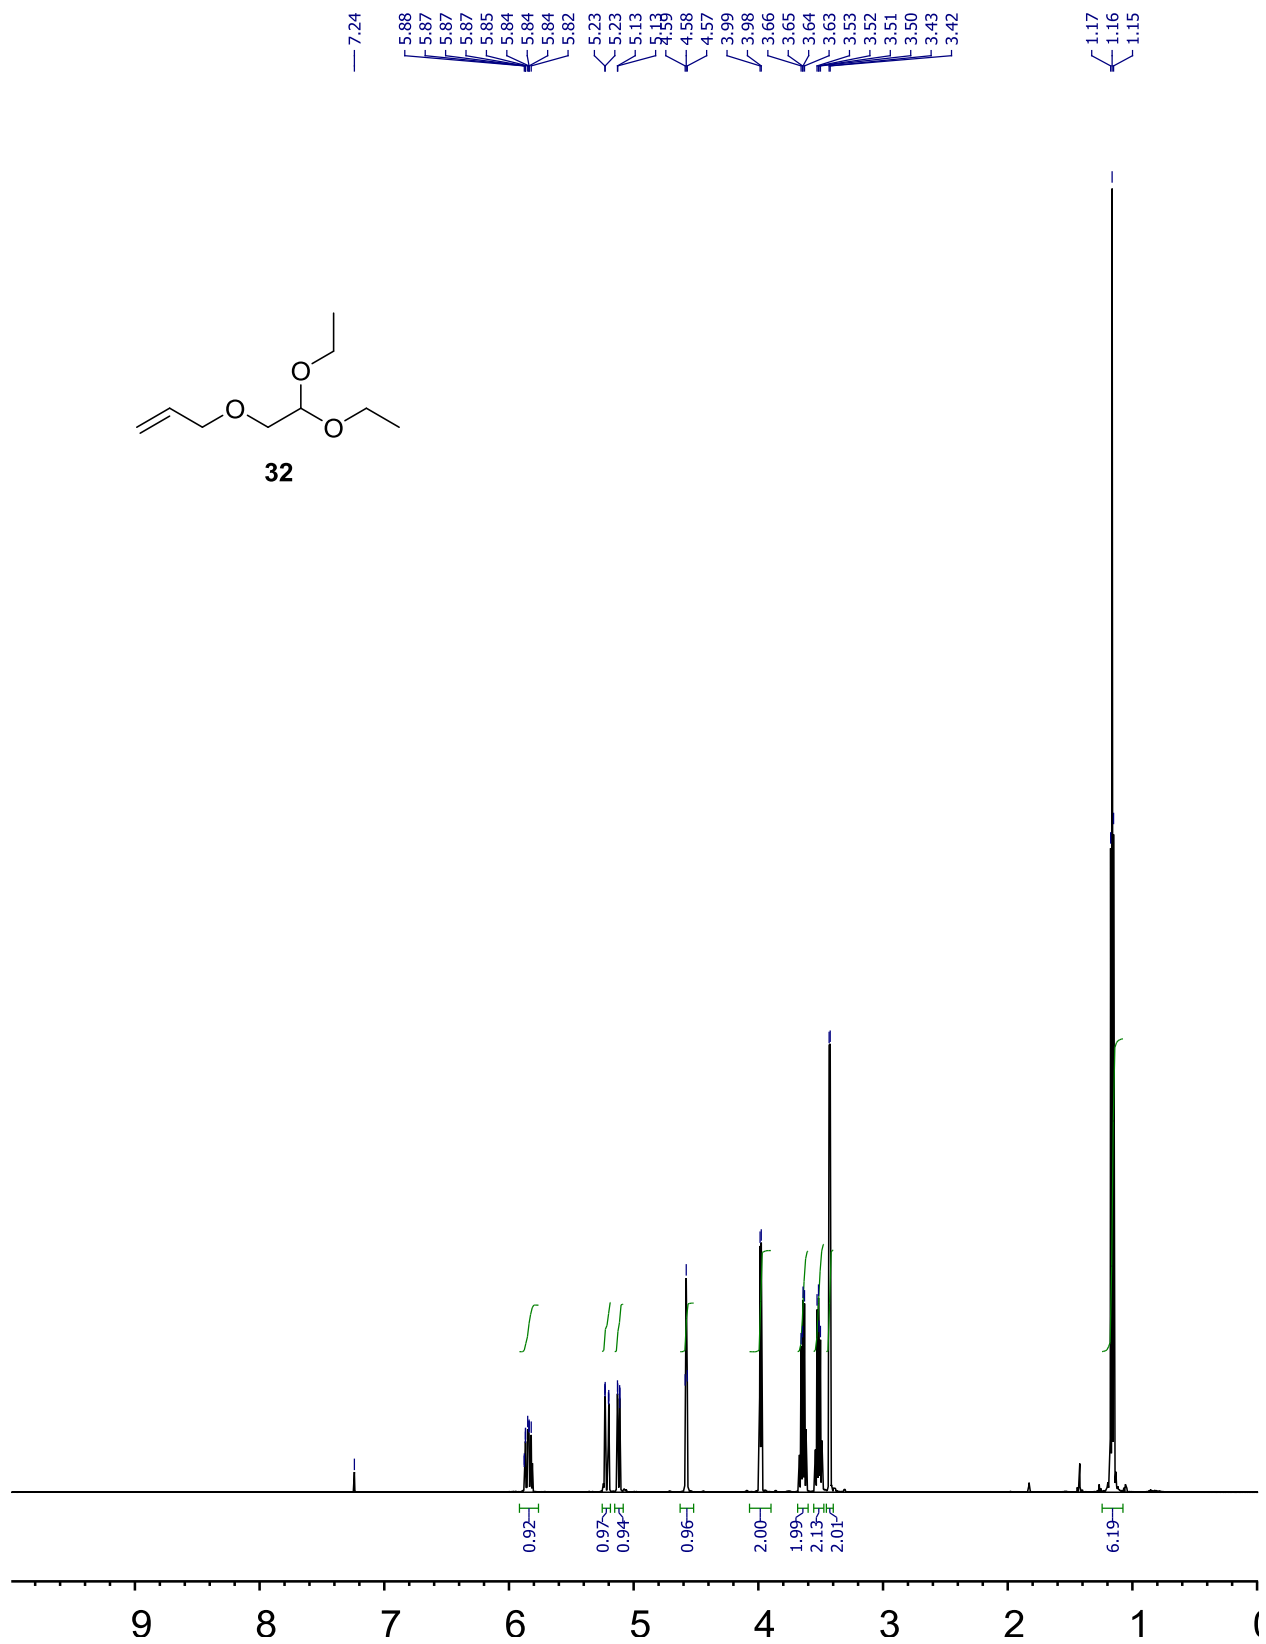

Figure S30. <sup>1</sup>H NMR spectrum of **32** (CDCl<sub>3</sub>, 600 MHz).

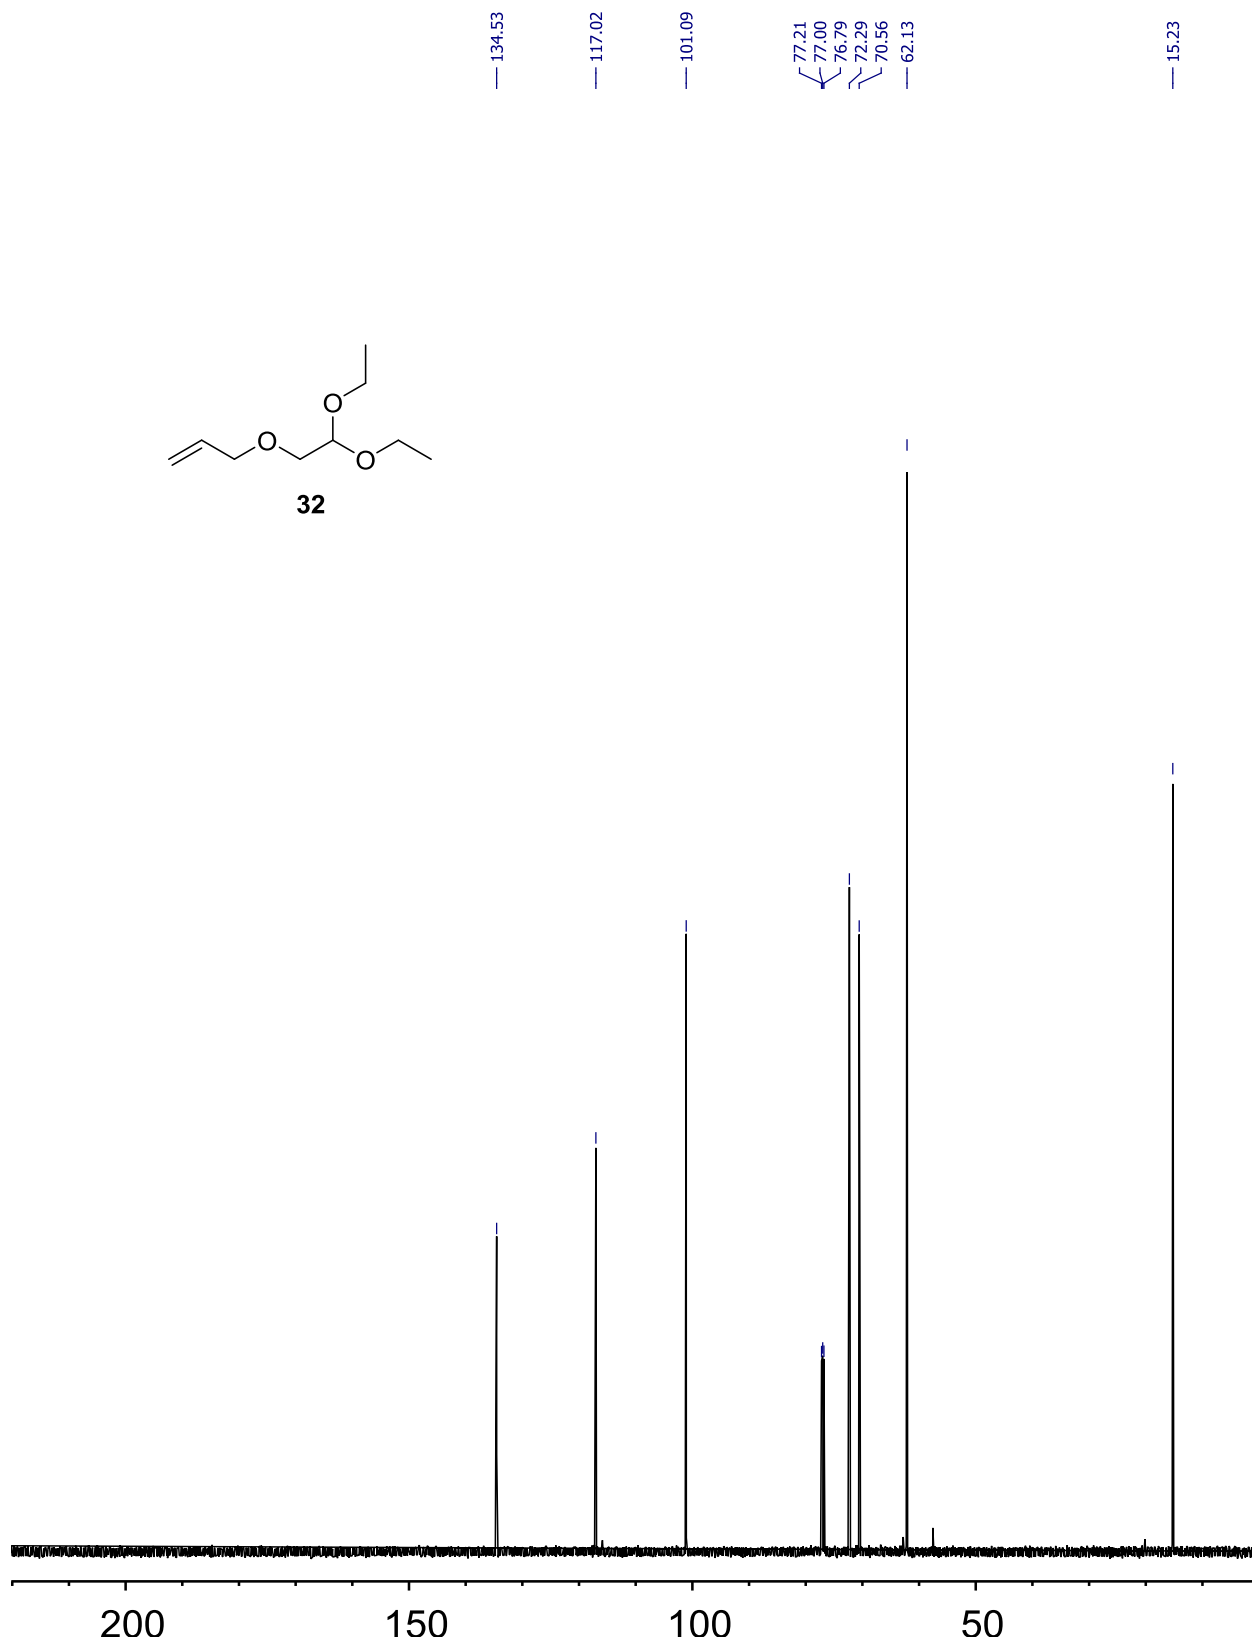

Figure S31.  $^{13}\text{C}$  NMR spectrum of **32** (CDCl<sub>3</sub>, 150 MHz).

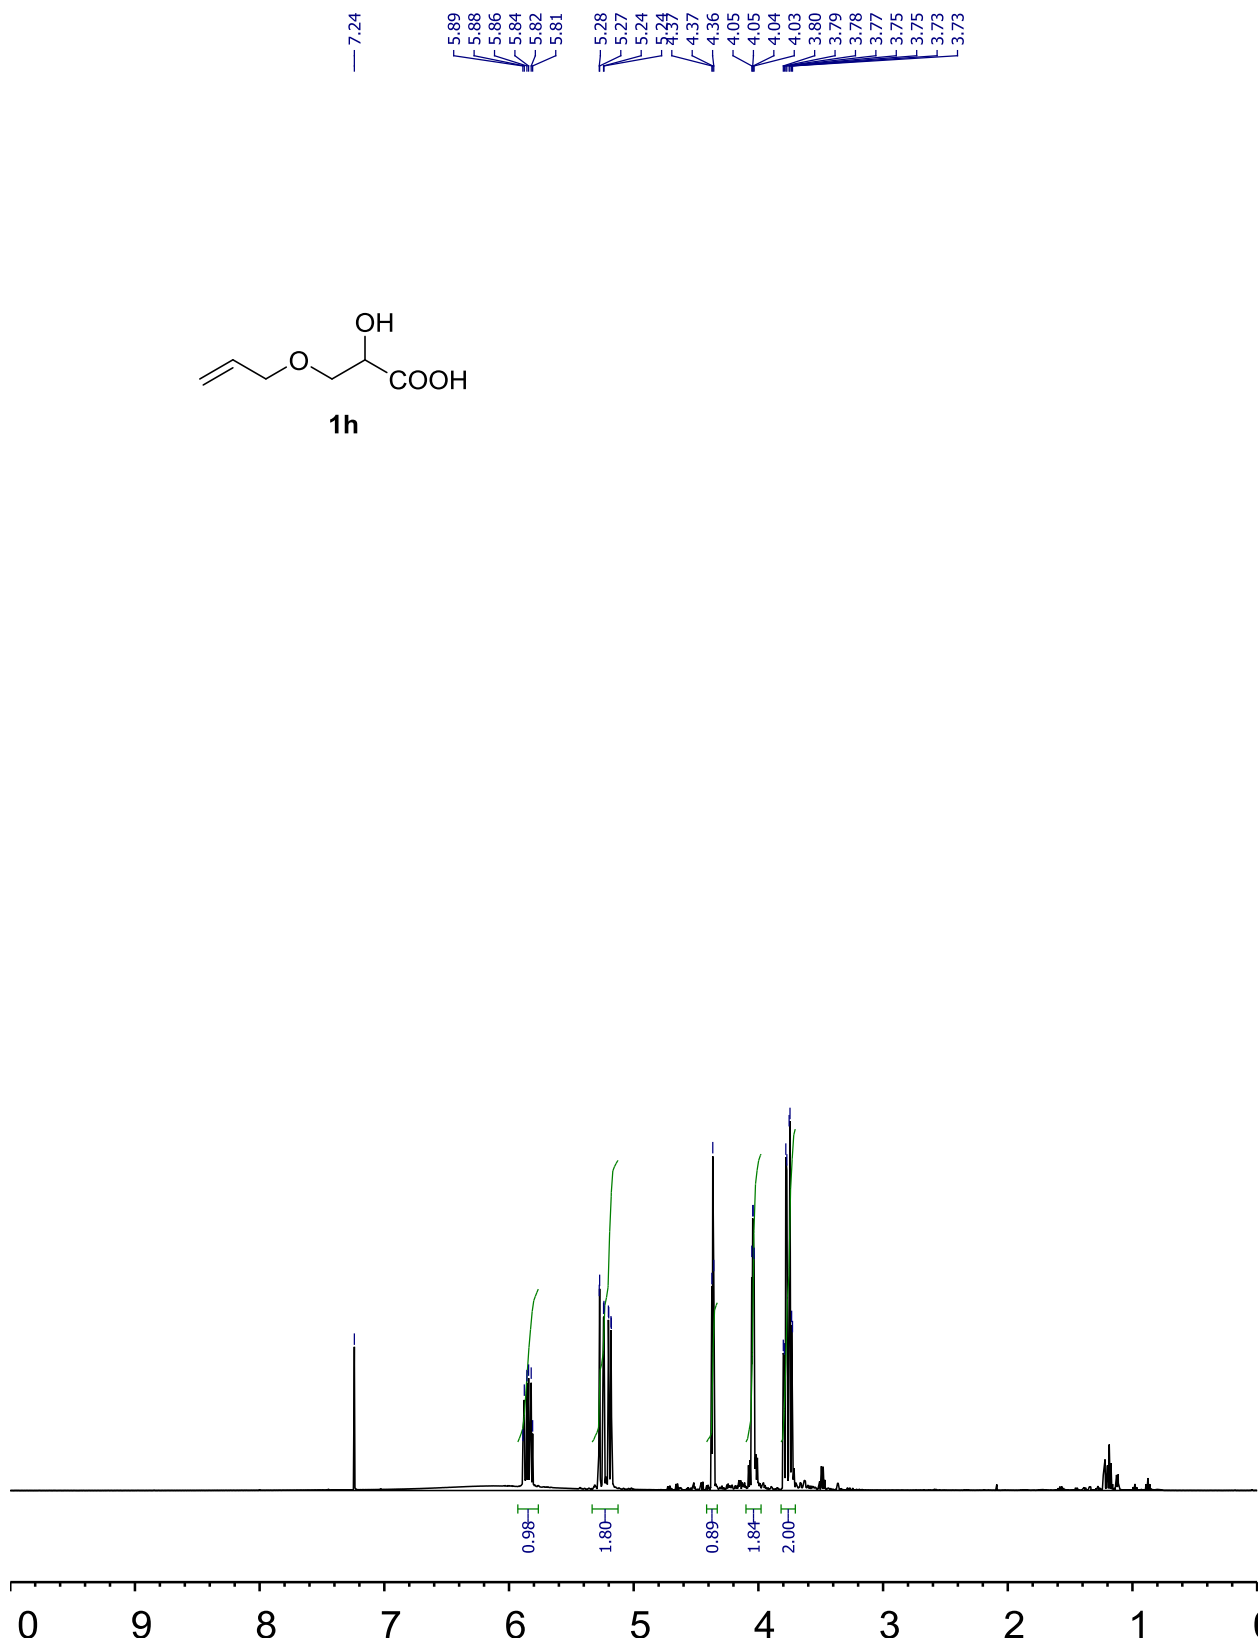

**Figure S32.** <sup>1</sup>H NMR spectrum of **1h** (CDCl<sub>3</sub>, 500 MHz).

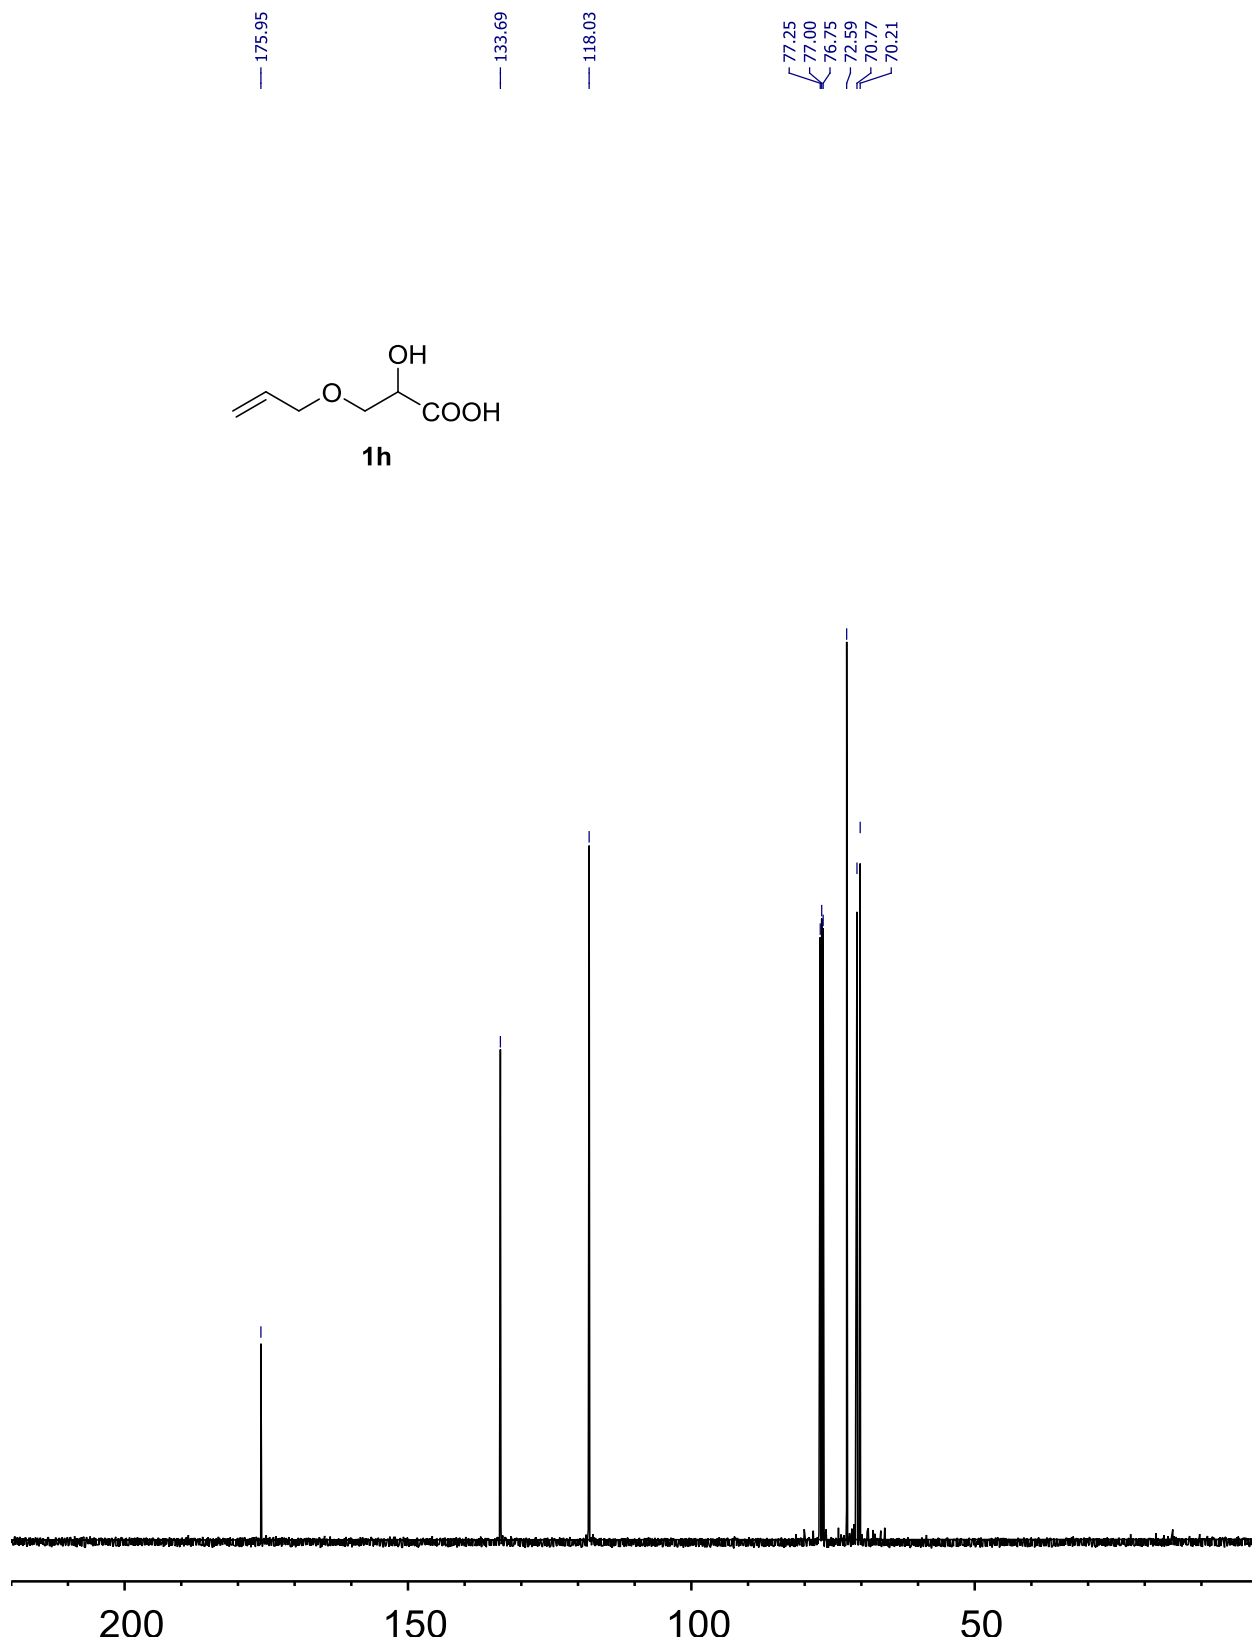

**Figure S33.**  $^{13}\text{C}$  NMR spectrum of **1h** (CDCl<sub>3</sub>, 125 MHz).
